# 1 The fruit fly *Anastrepha obliqua* harbors three kingdoms of life in its intestinal tract

2

3

4 Amores GR<sup>1</sup>, Zepeda-Ramos G<sup>1</sup>, García-Fajardo LV<sup>1</sup>, Hernández Emilio<sup>2</sup>, Guillén-Navarro Karina<sup>1\*</sup>

5

6

7 <sup>1</sup> Laboratorio de Biotecnología Ambiental y Agroecológica, Grupo Académico de Biotecnología Ambiental, El

8 Colegio de la Frontera Sur (ECOSUR), Tapachula, Chiapas, Mexico.

9 <sup>2</sup> Programa Moscafrut DGSV-SENASICA-SAGARPA, Subdirección de Desarrollo de Métodos, Chiapas, Mexico.

10

11

12 \*Corresponding author:

13 E-mail: [kguillen@ecosur.mx](mailto:kguillen@ecosur.mx)

14 Phone: +52 (962) 6289800 ext. 5411,

15 Fax: +52 (962) 6289806

16

17

18

19

20

21

22

23

24

25

26

---

27 <sup>1</sup> El Colegio de la Frontera Sur, Carretera Antigua Aeropuerto Km. 2.5, Tapachula, Chiapas, Mexico.

28 <sup>2</sup> Programa Moscafrut, SENASICA-SAGARPA Camino a Cacaotales, S/N. C.P. 30860, Metapa de  
29 Domínguez, Chiapas, Mexico

## 30 Abstract

31 The fruit fly *Anastrepha obliqua* is an economically important pest for mango fruits in Mexico. The sterile insect  
32 technique is used to control this pest; it involves mass production and release of sterile flies to reduce  
33 reproduction of the wild population. As noted in different tephritidae, the performance of sterile males may be  
34 affected by the assimilation of nutrients under mass-rearing conditions. In the wild, the fly's life cycle suggests  
35 the acquisition of different organisms that could modulate fitness and physiology of the fly. Therefore, the  
36 microorganisms lodged in the gut may be determinative. For *A. obliqua*, there is no information regarding  
37 microorganisms other than bacteria. This study analyzed bacteria, fungi, and archaea communities in the *A.*  
38 *obliqua* gut through denaturing gradient gel electrophoresis (DGGE) profile of 16S and 18S ribosomal DNA  
39 markers. Besides, 16S sequencing and phylogenetic analysis provided a better description of bacteria, and  
40 archaea communities. We found that wild flies presented higher microbial diversity than laboratory samples.  
41 Phylogeny analyses of wild samples suggest the presence of microbial species related to fructose assimilation  
42 while laboratory microbial species suggest the presence of microorganisms leading to a specialized metabolism  
43 to process yeast as result of the consumption of an artificial diet. Here, the archaea kingdom is suggested as an  
44 important player in fly metabolism. This is the first report of the intestinal microbial (bacteria, archaea and fungi)  
45 composition of *A. obliqua*, which will aid in our understanding of the role of microorganisms in the development  
46 and physiology of the flies.

## 47 KeyWords

48 *Anastrepha obliqua*, Mass-rearing, Metabolism, Microbiome, Sterile Insect Technique.

## 49 Introduction

50 Fruit flies (Diptera: Tephritidae) encompass ~70 species (Jurkevitch, 2011), which infect more than 30 fruit  
51 species, leading to worldwide economic impacts (Qin *et al.*, 2015). In Mexico, despite being cosmopolitan, the  
52 Mediterranean fruit fly *Ceratitidis capitata* (Szyniszewska and Tatem, 2014) has been controlled by the sterile  
53 insect technique (SIT). However, the fruit fly *Anastrepha obliqua* (Macquart) is a pest that causes losses of fruit  
54 crops; from January to July 2018 there were losses of 22 million tons of mango (*Mangifera indica*) and spondias  
55 (*Spondias purpurea* and *S. mombin*) fruits (SENASICA, 2018). SIT is a biological technique without adverse  
56 impact on biodiversity and the environment. SIT involves the systematic mass release of irradiated sterile adult

competitive and flying males, which induce sterility in the wild population, by preventing offspring (KNIPLING, 1959; Montoya P. Toledo J., 2010).

Different efforts had been made to optimize the efficiency of SIT by enhancing the quality of sterile insects (Shelly and McInnis, 2001; Ami, Yuval and Jurkevitch, 2010). In this sense, nutrient assimilation is a critical factor for the quality of the released sterile insects. Composition of the artificial diet, enzymatic metabolic machinery, and microorganisms harbored in the fly's gut modulate assimilation, contributing to fly fitness (Nestel, Nemny-Lavy and Chang, 2004; Rivera-Ciprian *et al.*, 2017; Rempoulakis *et al.*, 2018). Additionally, the wildlife cycle of the fruit fly suggests the acquisition of different microorganisms, which exploit nutrients from the natural diet, modulating its biology (Domínguez J. Artiaga-López T., 2010; Ben-Yosef *et al.*, 2014). Therefore, the fly's gut ecology must be determinative in the modulation of fly fitness.

The microorganisms present within a host, known as microbiota, are generally well known for modulating host health and fitness (Sommer *et al.*, 2016; Thaiss *et al.*, 2016). In fruit flies, most of the microbial diversity studies have focused on elucidating the role of bacteria housed in the gut of different fly genera, such as *Ceratitis*, *Drosophila*, *Bactrocera*, *Helaeomyia*, and *Anastrepha* (Kadavy *et al.*, 2000; Kuzina *et al.*, 2001; Capuzzo *et al.*, 2005; Juneja and Lazzaro, 2009; Ben-Yosef *et al.*, 2014). Regarding these, bacterial microbiota such as *Klebsiella oxytoca*, *K. pneumoniae*, *Citrobacter freundii*, *Enterobacter* sp. and *Providencia rettgeri* have been evaluated as probiotics to enhance fly fitness (Ami, Yuval and Jurkevitch, 2010; Hamden *et al.*, 2013; Augustinos *et al.*, 2015; Roque-Romero *et al.*, 2020). Therefore, manipulation of resident bacterial populations could have an effect on host fitness, possibly by generating stronger sterile males, which will compete better against wild flies (Ami, Yuval and Jurkevitch, 2010; Kyritsis *et al.*, 2017). In addition, fungi and actinomycetes studies have focused on evaluating their role as insecticides, leading to the proposed use of different strains, such as *Beauveria bassiana*, *Metarhizium anisopliae*, and *Bacillus cereus* to improve biocontrol of *C. capitata* (Imoulan and Elmezziane, 2014; Navarro-Llopis *et al.*, 2015; Ruiu *et al.*, 2015; Samri *et al.*, 2017). Interestingly, for the same fly species, different microorganisms have been proposed to present a functional role, indicating the importance of elucidating the gut ecology of the fly.

For the related fly, *Anastrepha ludens*, bacteria such as *Citrobacter*, *Enterobacter*, *Klebsiella*, *Providencia*, and *Pseudomonas* have been found in its intestinal tract (Kuzina *et al.*, 2001). To date, studies on *Anastrepha* spp. have mainly focused on bacteria, and have not investigated other associated microorganisms, which could also

modulate physiology and fitness. Thus, knowing the ecology of the fly intestine would provide a better understanding of microbiota–insect interactions, multi-species community structure, and its effect on the host. To determine the microbiota diversity associated with the gut of *A. obliqua*, we employed 16S and 18S PCR-denaturing gradient gel electrophoresis (DGGE) to describe the diversity of fungi, bacteria, and archaea present in the intestinal tract of wild and laboratory flies. Moreover, we used cloning techniques of 16S-ribosomal DNA (rDNA) coupled with phylogenetic analyses to gain better insight of the species harbored in the fly intestine. This knowledge will provide the basis for further studies of the microbiota in the digestive tract of *A. obliqua*, which could improve the success of sterile insect release.

## Materials and Methods

### Biological material

The larvae and adult *A. obliqua* flies were obtained from a mass-rearing colony at Moscafrut Facility in Metapa de Domínguez, Chiapas, Mexico. Third instar larvae were harvested and fed a diet containing 19% corn cob powder (Mafornu, Cd. Guzmán, Jalisco, Mexico), 5.3% corn flour (Maíz Industrializado del Sureste, Arriaga, Chiapas, Mexico), 7% torula yeast (Lake States, Div. Rhineland Paper, Rhineland, WI, USA), 9.2% sugar (Ingenio Huixtla, Chiapas, Mexico), 0.4% sodium benzoate (Cia. Universal de Industrias, S.A. de C.V., Mexico), 0.2% nipagin (Mallinckrodt Specialty, Chemicals Co., St. Louis, MO, USA), and 0.44% citric acid (Anhidro Acidulantes FNEUM, Mexana S. A. de C.V., Morelos, Mexico) (Orozco-Dávila *et al.*, 2017). Lab adult specimens were collected after emerging from the pupae stage on vermiculite incubated at approximately 14 days and fed with hydrolyzed protein:sugar (in a 1:3 ratio), and water until collection at 12 days of age. Wild larvae were obtained from infested mango fruits provided by the Junta Local de Sanidad Vegetal del Soconusco, Chiapas. Third instars were obtained from infested mango fruits collected in the surroundings of the town of Tuxtla Chico, Chiapas, Mexico. Wild adult flies were caught at the end of 2010 harvest and during the 2011 harvest in mango orchards in the same town using modified MacPhail traps baited with hydrolyzed protein as an attractant to catch live adults (Enkerlin, 2018). Flies were taxonomically identified using the keys previously described (FAO/OIEA, 2018). All samples were washed twice with 70% ethanol. Dissections were performed to extract the digestive tract under sterile conditions in a laminar flow hood and stored in 70% ethanol at -20°C until processing.

### DNA extraction



140 *al.*, 2004) were used for the second. One primer for each pair was designed with a GC clamp for DGGE analysis.

141 The reaction mixture contained 0.20 pmol of each primer, 1x buffer, 0.20 mM dNTPs (dinucleotide triphosphate),

142 1.5 mM MgCl<sub>2</sub> (2.0 mM for fungi), 1 U *Taq* DNA polymerase (Invitrogen, USA), and template DNA for a total

143 volume of 20 µl. Negative control included ultrapure water, whereas *Escherichia coli* DH5-α, *Streptomyces* sp.,

144 and *Trichoderma* sp., DNA were used as positive controls for bacteria, actinomycete and fungi, respectively.

145 Amplification protocol in bacteria and actinomycetes consisted in a denaturation at 94 °C for 5 min, followed by

146 30 cycles of 1 min at 95 °C, 1 min at 58 °C and 40 sec at 72 °C, with a final extension at 72 °C for 5 min. The

147 actinomycetes nested amplification used the same protocol for second amplification; for the first annealing

148 temperature was modified at 53 °C (Das, Royer and Leff, 2007). To confirm the absence of actinomycetes in

149 PCR negative samples, we determined the minimum amount of *Streptomyces* DNA that renders an amplicon

150 using the corresponding primers. This PCR was done using serial dilutions (14 ng to 0.0014 ng) of DNA.

151 Fungi PCR conditions consisted of a denaturation at 95 °C for 2 min, followed by 35 cycles of 30 sec at 95 °C,

152 30 sec at 50 °C, and 1 min at 72 °C, with a final extension at 72 °C for 5 min (Nikolcheva, Cockshutt and

153 Bärlocher, 2003).

154 Archaea nested PCR protocol for the first reaction was: denaturation at 94 °C for 5 min, followed by 30 cycles of

155 40 sec at 94 °C, 40 sec at 53 °C, 1 min at 72 °C, and a final extension at 72 °C for 5 min. For the second

156 reaction, alignment temperature was changed to 57 °C. Total DNA from an anaerobic plant sludge wastewater

157 treatment was used as PCR positive control.

158 For DGGE, PCR products were quantified using Molecular Kodak Imaging software, and loaded in equal

159 concentrations directly on a 0.8% polyacrylamide gel with a 20–50% denaturing gradient of urea and formamide,

160 and electrophoresed in 1% TAE buffer (40 mM TAE, 2 mM Tris-acetate, and 1 mM Na<sub>2</sub>EDTA, pH 8.5).

161 Electrophoresis was performed in the D-Code™ Universal Mutation Detection System (BioRad, Hercules, CA,

162 USA) at 90 V for 8.5 h, with a constant temperature of 60°C. Subsequently, the gels were stained with SYBR

163 Gold. Each DGGE was repeated three times in each experiment.

164 The DGGE band profiles indicate the different microbial communities from the fly midgut (Online Resource 2).

165 The profiles were compared using the Jaccard index (J), which allows analysis of the biodiversity found in a

166 sample where the maximum value indicates a greater diversity. This was calculated according to the following

167 formula:  $J = n_{AB} (n_A + n_B - n_{AB}) - 1$ , where  $n_{AB}$  is the number of bands in common between lanes A and B,  $n_A$   
168 is the total number of bands in lane A, and  $n_B$  is the total number of bands in lane B.

169 The Shannon index ( $H'$ ) allows comparisons of community similarity between two samples, where a value of 1.0  
170 (or 100%) corresponds to communities that share an identical pattern, and a value of 0 indicates that no  
171 difference exists. This index was calculated using the following equation:  $H' = - \sum (n_i/N) (\log n_i/N)$ , where  $H'$  is the  
172 diversity, and  $n_i/N$  is the number of individuals of the species given by band intensity ( $n_i$ ) to the total subjects ( $N$ ,  
173 the total intensity of all bands of the same sample); *i.e.*, the relative abundance of species. Band intensity reflects  
174 the abundance of the same (Eichner *et al.*, 1999) and theoretically represents a genus, in this case, analyzed by  
175 Molecular Kodak Imaging software.

#### 176 **16S cloning and phylogenetic analysis**

177 The 16S rDNA amplicons for actinomycetes, bacteria, and archaea were obtained as described above. The  
178 purified PCR products were cloned into a p-JET vector with CloneJet PCR Cloning Kit (Thermo Scientific,  
179 Waltham, MA, USA) and transformed into *E. coli* DH5- $\alpha$  cells (Sambrook, 2001). Clones were sequenced using  
180 pJET primers by capillary sequencing at Macrogen Inc. (Korea). The sequence chromatograms were visually  
181 inspected and manually trimmed using AliView software (Larsson, 2014). To identify closely related 16S rRNA  
182 genes, the remaining sequences were analyzed with the BlastN tool at 99% identity against the 16S archaea,  
183 actinomycete, and bacteria database at NCBI as described in the main text. NCBI accession number of the  
184 sequences employed for phylogenetic analyses are shown at Online Resource 1. Multiple sequence alignment  
185 was performed using ClustalW (Thompson, Higgins and Gibson, 1994). The best suitable model and  
186 phylogenetic trees were constructed using Molecular Evolutionary Genetics Analysis (MEGAX) software and  
187 several algorithms (Kimura, 1980; Felsenstein, 1985; Tamura, 1992; Tamura *et al.*, 2013). The accuracy of the  
188 tree topology was performed by 1000 bootstrap replicates (Felsenstein, 1985).

#### 189 **Geneious diversity analysis.**

190 The 16S rDNA clones of bacteria and archaea communities obtained from wild and laboratory adult and larvae  
191 flies were loaded into Geneious software version 11.1 (Kearse *et al.*, 2012). Subsequently, all submitted NCBI  
192 sequences as well as those which display robust electropherogram (Online Resource 3) were manually curated  
193 and merged to gain a general view of the global biological diversity harbored at *A. obliqua*. Clean sequences  
194 were then analyzed using the 16S diversity tool in Geneious software.



## 195 Results and Discussion

### 196 Bacteria communities

197 The microbiota interacts with its host, modulating nutrient assimilation, health and fitness. In the related fruit-fly  
198 pests, *Anastrepha obliqua*, *A. ludens*, and *Ceratitis capitata*, is known that gut enzymatic activity (Rivera-Ciprian  
199 *et al.*, 2017) as well as bacteria regulates their food bio-assimilation capabilities producing fitness effects (Kuzina  
200 *et al.*, 2001; Ami, Yuval and Jurkevitch, 2010; Gallo-Franco & Toro-Perea, 2020). Because of this, we got  
201 interested in disclosing *A. obliqua*'s bacterial microbiota diversity with an additional systematic search for  
202 actinomycetes due to its host-related biochemical metabolism. For this, DNA was extracted from the digestive  
203 tract of wild adult and larvae (AW and LW, respectively) and laboratory (AL and LL, respectively) flies, and  
204 samples were subjected to 16S rDNA bacterial and actinomycete PCR amplification (as described in  
205 methodology and further referred as Gram-positive population for actinomycete) followed by DGGE. We observe  
206 different patterns of migration between developmental stages and groups suggesting different bacterial  
207 communities. Besides, our DGGE Gram-positive enriched experiments over all samples recovered just three  
208 communities in the midgut of wild larvae flies sample. To confirm this, we tested a minimum amount of DNA for  
209 the absence of actinomycetes in other stages of the fly. We could only detect actinomycetes up to a minimum  
210 concentration of 0.14 ng of DNA, suggesting that if there are actinomycetes, they are found in undetectable  
211 amounts in the samples analyzed by DGGE as has been reported for taxa of low abundance (González *et al.*,  
212 2011). It has been demonstrated that the detection limit of PCR-DGGE is 104–108 CFU/ml (Ercolini, 2004),  
213 suggesting that the communities in our samples are below these limits or the primers were inefficient for  
214 actinomycetes in this fly. Indeed, amplification of 16S rDNA for actinomycetes showed smear bands (data not  
215 shown) in all fly stages, which were subsequently used for cloning.

216 In general, population index analyses show that adult flies harbor higher diversity than larvae. Specifically,  
217 Shannon index ( $H'$ ) analyses (Table 1) showed that adult wild flies presented the greatest bacterial diversity (1.22  
218  $H'$ ), as expected in a native environment with a varied diet, which could help establish a more diverse group of  
219 microorganisms. The wild larvae showed inferior diversity (1.07  $H'$ ) than the adult, as its development is limited  
220 within the host fruit. Furthermore, Jaccard index ( $J$ ) analysis (Table 1) showed that LW and AW share 53% of  
221 their bacterial communities, suggesting the same vertical transmission that has been observed in *C. capitata*  
222 (Behar, Yuval and Jurkevitch, 2008), where the female establishes populations of microorganisms during



223 oviposition, which may contribute to optimal development in the larval stage and some are kept during adulthood.

224 Regarding mass-rearing flies, larvae and adult samples showed lower diversity ( $H' = 0.94$  and  $0.95$ , respectively)

225 than wild flies and shared 63% of their communities. This could be due to a similar diet and confined

226 environment. It is worth mentioning that, contrary to other works, the adult wild flies were collected as adults from

227 mango orchards and not from fruits infested with larvae letting remain in lab conditions until emergence, so wild

228 gut microbiome was better represented. Comparison of mass-rearing and wild flies showed that larvae samples

229 share 52%, while adult flies share only 36% of their microorganism communities. Since the mass-rearing *A.*

230 *obliqua* colony has been maintained for more than 150 generations, this allows us to suggest that it must contain

231 bacterial core microbiota from both natural and mass-rearing environments, which could contribute to metabolic

232 function of the flies.

233 Upon bacteria diversity evaluation, we were interested in identifying the species that could be harbored in the fly

234 midgut. With this in mind, amplified and cloned specific 16S rRNA gene region sequences were blasted against

235 the 16S bacteria NCBI database, and a phylogenetic tree was constructed. We obtained 30 bacterial and 23

236 actinomycetes sequenced clones; after analysis, we kept 15 bacteria and 3 actinomycetes unique sequences.

237 Thus, taxonomic classification of these sequences was restricted because of the low throughput cloning and

238 sequencing methods.

239 The phylogenetic analysis of bacteria cloned sequences showed two main groups (Fig. 1) composed of Gram

240 positive and negative bacteria. In general, *Enterobacteriaceae* is the most common group found in the intestinal

241 tract of fruit flies (Kuzina *et al.*, 2001; Behar, Yuval and Jurkevitch, 2005, 2008) as shown here for all samples.

242 Our results showed that the majority of the mass-rearing larvae sequences were clustered within an

243 *Enterobacteriaceae* group composed of *Providencia*, *Klebsiella*, *Serratia*, *Pectobacterium*, and *Morganella*, but

244 were undetected in non-irradiated laboratory adult samples (Fig. 1 compare light-dark blue circles). In adult flies,

245 microbiota composition is mainly studied in mass-rearing individuals with evidence of decreases on those

246 *Enterobacteriaceae* strains, but maintaining populations of *Klebsiella*, *Providencia* and *Enterobacter*, by adding

247 them as probiotics after irradiation improves mating capabilities and fly development (Ami, Yuval and Jurkevitch,

248 2010; Augustinos *et al.*, 2015; Liu *et al.*, 2016; Roque-Romero *et al.*, 2020), supporting the importance of those

249 strains in the metabolism of the fly. One LL sequence was related to *Aerococcus viridians* and *Enterococcus*

250 *fecalis*. These bacteria species have been differentially described in wild and mass-rearing larvae and adult flies

251 of *Drosophila melanogaster*, *Ceratitis capitata*, *Bactrocera* spp., and *Anastrepha ludens* (Juneja and Lazzaro,  
252 2009; Ami, Yuval and Jurkevitch, 2010; Wang *et al.*, 2014). And, those bacterial strains are related to the diet  
253 nutrients metabolisms in flies such as urea metabolization into amino acids, suggesting that these bacterial  
254 strains could contribute to nutrient assimilation (Ben-Yosef *et al.*, 2014, 2015). The mass-rearing adult sequences  
255 clustered within metabolically specialized species of bacteria, such as members of the *Desulfovibrionaceae*  
256 family and *Lentisphaerae* phylum (i.e., *Victivallis* and *Oligosphaera* spp.) (Zoetendal *et al.*, 2003; Fuerst, 2013;  
257 Qiu *et al.*, 2013). Sulfate reducing bacteria (*Desulfovibrionaceae* family) are found in humans (Loubinoux *et al.*,  
258 2002), where they modulate the metabolism of primary fermenter bacteria in the intestine to regulate energy  
259 supply; they have also been linked to bowel disease (Wegmann *et al.*, 2017). In insects, *Desulfovibrionaceae*  
260 family bacteria are found in the beetle *Amblonoxia palpalis* with no effect in their populations (Koneru *et al.*,  
261 2016). *Lentisphaerae*-isolated bacteria are related to sugar fermentation (Qiu *et al.*, 2013). The presence of most  
262 of the adult sequences at this bacteria group suggest that adult laboratory flies develop a specialized microbiota  
263 related to mass-rearing process.

264 In the Gram-positive bacterial group, one mass-rearing adult sequence was related to *Rarobacter* species.  
265 Isolated *Rarobacter* species can use a broad spectrum of carbohydrates, such as D-fructose and polyols, in the  
266 presence of proteinaceous substrates or inorganic nitrogen, and can also produce proteases to lyse yeast  
267 (Shimoi and Tadenuma, 1991). These microbial populations might play an important metabolic role within the fly,  
268 since artificial diets contain different compounds, such as yeast (Domínguez J. Artiaga-López T., 2010), but also  
269 contain preservatives, such as methylparaben, which can affect microbial populations and mate choices, as has  
270 been shown in *D. melanogaster* (Obadia *et al.*, 2018). Altogether, in addition to the irradiation process, the  
271 mass-rearing conditions and biological processes within the fly could also be responsible for controlling the  
272 bacteria load. These results suggest the importance of the microbial species described here in modulating the  
273 metabolism of mass-rearing *A. obliqua* fruit flies, although their functions during the nutrient assimilation process  
274 have yet to be determined. Our results also suggest that microbiota and host interactions help establish the  
275 proper metabolic conditions to modulate fly fitness.

276 Regarding wild samples (Fig. 1, triangles), larvae sequences were related to the *Enterobacteriaceae*  
277 (*Escherichia* and *Kosakonia*) and *Pseudomonadaceae* families. *Kosakonia sacchari* is a nitrogen-fixing  
278 bacterium reported in *Saccharum officinarum* L. However, the isolated strain uses sugars such as fructose and

glucose (Chen *et al.*, 2014); thus, this strain could metabolize sugar. *Pseudomonas* spp. has been identified in adult wild *C. capitata* and adult laboratory *A. ludens* (Kuzina *et al.*, 2001; Behar, Yuval and Jurkevitch, 2008). Behar *et al.* showed in 2008 that *P. aeruginosa* regulates fly longevity by modulating the endemic *Enterobacteriaceae* population in the midgut of *C. capitata* flies. These strains are also present in artificial diets and induce beneficial effects during larval development and in adult flies (Augustinos *et al.*, 2015; Rempoulakis *et al.*, 2018). Moreover, the presence of strains such as *Pseudomonas*, *Erwinia*, and *Escherichia* also suggests that flies can be considered as reservoirs; in flies, strains of the same genus were found to induce disease in fruits (Kadavy *et al.*, 2000; Sela *et al.*, 2005; Kapsetaki *et al.*, 2014; Ordax *et al.*, 2015). The wild adult sequences were related to *Tatumella* and *Pluralibacter*, and *Pluralibacter* was described together with *Enterobacter cloacae* in *A. ludens* (Kuzina *et al.*, 2001). Presence or addition as probiotics of those strains induce an enhanced fitness in mass-rearing sterile flies (Ami, Yuval and Jurkevitch, 2010), supporting its role in wild fitness success. Altogether, we present evidence of the Gram-positive and negative bacteria diversity harbored in the midgut of wild and mass-rearing *A. obliqua* flies. These results are consistent with the microbial communities reported in *Anastrepha* related flies (Ventura *et al.*, 2018; Gallo-Franco and Toro-Perea, 2020; Roque-Romero *et al.*, 2020). The identification of different species suggests molecular crosstalk between these microorganisms and the host, which is important in metabolic pathways such as carbon and nitrogen uptake. It remains to be determined whether those communities are involved in commensalism, parasitism, or symbiosis.

## Archaea communities

Archaea are distributed in extreme and moderate habitats in which they play a significant role because of their metabolic differences compared to prokaryotic and eukaryotic organisms (Hara *et al.*, 2005; Pikuta, Hoover and Tang, 2007; Bräsen *et al.*, 2014; Könneke *et al.*, 2014). For insects such as cockroaches, termites, and beetles, which can survive on a low-nutrient diet, archaea of the class *Halobacteria* and *Methanomicrobia* provide the proper conditions in the intestine (e.g., CH<sub>4</sub>) for the development of other bacteria that modulate host metabolism (Gijzen *et al.*, 1991; Donovan *et al.*, 2004; Ceja-Navarro *et al.*, 2014). Due to its biochemical and biological importance, we were interested in analyzing the diversity of archaea communities in the gut of *A. obliqua*. The Shannon index showed that adult flies (wild, H' = 1 and mass-rearing, H' = 0.8) have greater diversity compared to larval stages (wild and mass-rearing, H' = 0.77) (Table 1). The trend, as in bacterial communities, is that the wild adult exhibits greater diversity than wild larvae and mass-rearing samples, possibly due to a greater variety

in their diet. The Jaccard index showed that wild specimens have similar archaea communities (77%), whereas the adult and larvae mass-rearing flies share 83% of their communities.

Besides, a comparison between adult and larvae stages also showed that they share more than 70% of their communities. Specifically, the AW and AL samples share 78%, while LW and LL share 85% of their archaea communities. As stated, archaea are endowed with particular pathways to produce CH<sub>4</sub>, but also modify other metabolic pathways, such as the Embden-Meyerhof-Parnas and Entner-Doudoroff pathways, which are related to sugar fermentation (Bräsen *et al.*, 2014); this could explain the presence of similar archaea communities between the individuals analyzed as a requirement for the proper metabolism of nutrients. Overall, we suggest that archaea may be essential throughout the cycle life of the fly, and likely could be determined by the mother and diet, as described and supported above in the case of bacteria.

To gain a better perspective of the archaea species present in the midgut of *A. obliqua*, we cloned the 16S PCR product prior to sequencing. We got 45 sequences and after NCBI submission we kept 29 sequences. These primers have been shown to detect bacterial strains (Coolen *et al.*, 2004). Therefore, we blasted our sequences against the 16S archaea database and, for the sequences with no match; a subsequent blast against the 16S bacteria databases at NCBI was performed. The sequences were analyzed as described in the methodology and a phylogenetic tree was constructed. Two main clades were observed, archaea and bacteria (Fig. 2).

Interestingly, bacterial species detected with archaea-directed primers were different from the species identified with bacteria primers (compare Fig. 1 with bacteria clade in 2).

Mass-rearing samples were mainly clustered at the archaea clade and one AL sequence clustered at the bacteria clade within the *Enterococcus* branch, which is associated with lactic acid production (Kadri *et al.*, 2015). Mass-rearing larvae were related to *Halalkalicoccus* species (*Halobacteriaceae* family), which can grow on fructose and mannose in the laboratory (Xue *et al.*, 2005; Poehlein *et al.*, 2016). Adult laboratory samples were related to strains that use inorganic compounds as an energy source but also organic compounds, such as yeast. These strains were *Nitrososphaera* spp., and *Thermofilum* spp., which can grow in the presence of ammonia, yeast, and peptone (Tourna *et al.*, 2011; Toshchakov *et al.*, 2015). Knowing the nutritional content of the artificial diet employed for mass-reared flies, and the microbial species found, our results suggest that those strains could be gained via the diet, modulating the bio-assimilation process since laboratory flies are reared with artificial diets enriched with yeast.

335 In the wild samples, larvae sequences clustered within the *Haloterrigena*, *Natronorubrum*, *Natrinema*, and  
 336 *Haloferax* branch (*Halobacteriaceae* family). These species are related to phosphorus solubilization and can  
 337 grow in the presence of fructose (Castillo *et al.*, 2006; Yadav *et al.*, 2015). Interestingly, wild larvae were  
 338 collected from mangoes, and it is possible that these species could be enriched, as the mango has a high  
 339 content of fructose and phosphorus. Therefore, these strains could be ingested with the natural diet, or acquired  
 340 through vertical transmission, contributing to the host's sugar assimilation. Finally, adult wild sequences clustered  
 341 within the bacteria clade and no archaea was detected. Isolated *Ralstonia* and *Herbaspirillum* strains are  
 342 associated with copper bio sequestration and degradation of chlorophenol, respectively (Im *et al.*, 2004; Yang *et al.*,  
 343 2010). Copper compounds are used in different crops, such as tomato, cucumber, and mango (Cazorla *et al.*,  
 344 2002; İseri *et al.*, 2011). In mango crops, copper is used to avoid necrosis induced by *Pseudomonas syringae* pv.  
 345 *Syringae* (Cazorla *et al.*, 2002). In flies, depending upon the dose, this compound leads to positive and negative  
 346 effects. Positively, copper works by activating superoxide dismutase to regulate oxidative stress, modulating the  
 347 genotoxic effects of reactive oxygen species and therefore, fly survival increases; while copper intoxication leads  
 348 to the opposite outcome (Marchal-Ségault, 1993; Matsuo, Ooe and Ishikawa, 1997; Arcaya *et al.*, 2013; Southon,  
 349 Burke and Camakaris, 2013; Carmona *et al.*, 2015). This suggests that the species harbored in the *A. obliqua*  
 350 intestine could modulate fly fitness by regulating copper and oxidative metabolism.

351 To the best of our knowledge, this is the first record of archaea in the digestive tract of *A. obliqua*. Archaea are  
 352 important organisms for metabolism in the intestines of insects (Ceja-Navarro *et al.*, 2014). It has also been  
 353 described that archaea produce metabolites that are used by insects to locate fruits (Piñero *et al.*, 2015). Thus,  
 354 wild microorganisms could promote food pre-digestion, change the nutritional content, or improve digestion in the  
 355 fly gut (Lemaitre and Miguel-Aliaga, 2013). Altogether, the results presented here suggest that archaea and  
 356 bacteria strains, which could be ingested during natural or artificial feeding, could modulate metabolic pathways  
 357 in tephritidae through the digestion and assimilation of nutrients. Therefore, the differences between archaea and  
 358 bacteria specimens detected among our samples can highlight their importance in the midgut.

### 359 **Fungi diversity in wild and laboratory flies**

360 Fungi provide sustenance and dwellings for insects, while insects offer material for fungal decomposition, protect  
 361 growing spaces, and allow for transportation to new locations; these fungi-insect exchanges have been  
 362 described as convergent interactions (Bittleston *et al.*, 2016). In the intestine of *D. melanogaster*, 45 different

species of fungi have been identified, and this diversity is related to the feeding environment (Stefanini, 2018). For the fruit fly *Ceratitis capitata*, isolated species of fungi, as well as their metabolites, have been suggested to act as biocontrol agents (Ortiz-Urquiza *et al.*, 2009; Imoulan and Elmeziane, 2014; Navarro-Llopis *et al.*, 2015; Ruiu *et al.*, 2015). For *Bactrocera* spp., yeast of the genera *Hanseniaspora* and *Pichia* are fundamental in larval survival (Piper *et al.*, 2017). Therefore, fungi must also play an essential role in the intestine of *A. obliqua*. Consequently, we evaluated the presence of fungi in the midguts of all samples. *A. obliqua* (laboratory adult) 18S-DNA amplicon from a leg (FL) was used as a control to discard bands that were also present in the FL pattern in DGGE analysis. This assay was repeated three times to ensure reproducibility. Fungal communities observed in the intestine of wild adults had greater diversity than wild larvae samples. The wild adult fly exhibited greater diversity ( $H' = 0.8$ ) than wild larvae ( $H' = 0.67$ ), sharing 62% of their communities. In the case of the laboratory samples, a faint FL band pattern was observed with DGGE, restricting the  $H'$  and  $J$  analyses (Table 1). We did not obtain sequenced clones because host DNA was always in greater quantity than the fungi it harbored. Nevertheless, our results suggest that fungal diversity in wild samples was significantly different compared with laboratory flies. Therefore, the fungal community likely exerts a considerable impact on the biology of *A. obliqua* either through a symbiotic relationship or as a pathogen; it is known that the fungal community can play essential roles in insect guts, and has been shown to produce toxins that are pathogenic for insects, such as beetles and black flies (Kostovcik *et al.*, 2015; Varotto Boccazzi *et al.*, 2017). As beneficial guests, fungal communities could act as suppliers of organic ingredients, essential vitamins, and enzymes that promote digestion (Vega and Dowd, 2005). Fungi could also improve metabolism via sugar fermentation and nitrogen-fixing, as well as participate in pheromone production by synthesizing steroids, as has been shown in bark beetles (Klepzig *et al.*, 2009). It is possible some of these functions occur in the digestive tract of wild larvae and adult flies, which could explain the diversities found between wild and laboratory samples.

**16S rDNA hypervariable region diversity**

Our study aimed to increase our knowledge regarding *A. obliqua* microbiota. Through this process, we found that there are some biases that must be overcome to determine microbial diversity with the best possible accuracy. These biases start with the selection of DNA extraction methods, primer design, and PCR yield (Guillén-Navarro *et al.*, 2015). We showed that with the use of different primer sets aimed at the same target (diverse hypervariable regions of bacteria and actinomycetes 16S rDNA), it was possible to identify species that have not



391 been previously described in this fruit fly. Next generation sequencing methods using 16S rDNA would allow us  
 392 to increase the number of species identified, but could introduce biases due to different factors, one of which is  
 393 the use of primers targeted to only one or two 16S rDNA hypervariable regions, which limits species identification  
 394 in complex bacterial populations (Laursen, Dalgaard and Bahl, 2017). Thus, the phyla *Proteobacteria*,  
 395 *Actinobacteria*, and *Deinococcus* have been favored as the most abundant in *Anastrepha ludens*, *A. obliqua*, *A.*  
 396 *serpentina*, and *A. striata* through 16S pyrosequencing, with primers targeted to the V3 hypervariable region  
 397 (Ventura *et al.*, 2018). Our results also broaden our knowledge of the microbiota of *A. obliqua* with a 28% global  
 398 abundance of the Archaea kingdom (Fig. 3 and Online Resource 4, 5).  
 399 In this work, we present the inter-kingdom diversity harbored in the midgut of *A. obliqua*, expanding the intricate  
 400 microbial crosstalk, which could be related to different biological outcomes (e.g., bio-assimilation) in larvae and  
 401 adult wild or laboratory flies. It is important to note that the techniques based on the analysis of rRNA genes  
 402 amplified by PCR may not represent a complete and accurate picture of the microbial community. The estimation  
 403 of genetic diversity by DGGE is limited to members of dominant microbial communities, which must represent at  
 404 least 1% of the total microbial population to produce a visible band in DGGE (Muyzer, de Waal and Uitterlinden,  
 405 1993). This study is only the beginning of our understanding of the intestinal ecosystem of *Anastrepha*. We have  
 406 determined some predominant populations, which could significantly modulate the fitness and physiology in  
 407 mass-rearing and wild *A. obliqua* flies through an inter-kingdom communication of such communities. Further  
 408 studies are required to understand how these microorganisms affect metabolic processes, sexual behavior, and  
 409 other aspects of the fly's physiology. This knowledge will eventually improve the mass rearing technology of *A.*  
 410 *obliqua*, and focus on the discovery of microorganisms and enzymes of nutritional interest for fruit flies.

#### 411 **Acknowledgements**

412 This research was financed by the National Council of Science and Technology project CB-2008-01-101389, and  
 413 fellowship to GZ-R number 17171.

#### 414 **Electronic Supplementary Material**

415 **Online Resource 1** Table - NCBI accession number of the sequences used in this study.

416 **Online Resource 2** DGGE analysis of 16S biodiversity of bacteria, archaea, and fungi communities associated  
 417 at the intestine of *A. obliqua*.

418 **Online Resource 3** Electropherogram of 16S rDNA clones.



419 **Online Resource 4** 16S biodiversity of Bacteria and Actinomycete communities associated at the intestine of *A.*  
420 *obliqua* based on 16S rDNA sequences.

421 **Online Resource 5** 16S biodiversity of Archaea communities associated at the intestine of *A. obliqua* based on  
422 16S rDNA sequences.

## 423 **References**

424 Ami, E. Ben, Yuval, B. and Jurkevitch, E. (2010) 'Manipulation of the microbiota of mass-reared Mediterranean  
425 fruit flies *Ceratitis capitata* (Diptera: Tephritidae) improves sterile male sexual performance', *ISME Journal*, 4(1),  
426 pp. 28–37. doi: 10.1038/ismej.2009.82.

427 Arcaya, J. L. *et al.* (2013) '[Copper intoxication decreases lifespan and induces neurologic alterations in  
428 *Drosophila melanogaster*]', *Invest Clin*, 54(1), pp. 47–57. Available at:  
429 <https://www.ncbi.nlm.nih.gov/pubmed/23781712>.

430 Augustinos, A. A. *et al.* (2015) 'Exploitation of the medfly gut microbiota for the enhancement of sterile insect  
431 technique: Use of *Enterobacter* sp. in larval diet-based probiotic applications', *PLoS ONE*, 10(9). doi:  
432 10.1371/journal.pone.0136459.

433 Behar, A., Yuval, B. and Jurkevitch, E. (2005) 'Enterobacteria-mediated nitrogen fixation in natural populations of  
434 the fruit fly *Ceratitis capitata*', *Mol Ecol*, 14(9), pp. 2637–2643. doi: 10.1111/j.1365-294X.2005.02615.x.

435 Behar, A., Yuval, B. and Jurkevitch, E. (2008) 'Gut bacterial communities in the Mediterranean fruit fly (*Ceratitis*  
436 *capitata*) and their impact on host longevity', *Journal of Insect Physiology*, 54(9), pp. 1377–1383. doi:  
437 10.1016/j.jinsphys.2008.07.011.

438 Ben-Yosef, M. *et al.* (2014) 'Symbiotic bacteria enable olive flies (*Bactrocera oleae*) to exploit intractable sources  
439 of nitrogen', *J Evol Biol*, 27(12), pp. 2695–2705. doi: 10.1111/jeb.12527.

440 Ben-Yosef, M. *et al.* (2015) 'Symbiotic bacteria enable olive fly larvae to overcome host defences', *R Soc Open*  
441 *Sci*, 2(7), p. 150170. doi: 10.1098/rsos.150170.

442 Bittleston, L. S. *et al.* (2016) 'Convergence in Multispecies Interactions', *Trends Ecol Evol*, 31(4), pp. 269–280.  
443 doi: 10.1016/j.tree.2016.01.006.

444 Bräsen, C. *et al.* (2014) 'Carbohydrate metabolism in Archaea: current insights into unusual enzymes and  
445 pathways and their regulation', *Microbiol Mol Biol Rev*, 78(1), pp. 89–175. doi: 10.1128/MMBR.00041-13.

446 Capuzzo, C. *et al.* (2005) "'Candidatus *Erwinia dacicola*", a coevolved symbiotic bacterium of the olive fly

447 *Bactrocera oleae* (Gmelin)', *Int J Syst Evol Microbiol*, 55(Pt 4), pp. 1641–1647. doi: 10.1099/ijs.0.63653-0.

448 Carmona, E. R. *et al.* (2015) 'Genotoxicity of copper oxide nanoparticles in *Drosophila melanogaster*', *Mutat Res*

449 *Genet Toxicol Environ Mutagen*, 791, pp. 1–11. doi: 10.1016/j.mrgentox.2015.07.006.

450 Castillo, A. M. *et al.* (2006) '*Natrinema ejinorensis* sp. nov., isolated from a saline lake in Inner Mongolia, China',

451 *Int J Syst Evol Microbiol*, 56(Pt 11), pp. 2683–2687. doi: 10.1099/ijs.0.64421-0.

452 Cazorla, F. M. *et al.* (2002) 'Copper Resistance in *Pseudomonas syringae* Strains Isolated from Mango Is

453 Encoded Mainly by Plasmids', *Phytopathology*, 92(8), pp. 909–916. doi: 10.1094/PHYTO.2002.92.8.909.

454 Ceja-Navarro, J. A. *et al.* (2014) 'Compartmentalized microbial composition, oxygen gradients and nitrogen

455 fixation in the gut of *Odontotaenium disjunctus*', *ISME J*, 8(1), pp. 6–18. doi: 10.1038/ismej.2013.134.

456 Chen, M. *et al.* (2014) 'Complete genome sequence of *Kosakonia sacchari* type strain SP1(T.)', *Stand Genomic*

457 *Sci*, 9(3), pp. 1311–1318. doi: 10.4056/sigs.5779977.

458 Coolen, M. J. L. *et al.* (2004) 'Evolution of the methane cycle in Ace Lake (Antarctica) during the Holocene:

459 Response of methanogens and methanotrophs to environmental change', in *Organic Geochemistry*. Pergamon,

460 pp. 1151–1167. doi: 10.1016/j.orggeochem.2004.06.009.

461 Das, M., Royer, T. V and Leff, L. G. (2007) 'Diversity of fungi, bacteria, and actinomycetes on leaves

462 decomposing in a stream', *Appl Environ Microbiol*, 73(3), pp. 756–767. doi: 10.1128/AEM.01170-06.

463 DeLong, E. F. (1992) 'Archaea in coastal marine environments', *Proc Natl Acad Sci U S A*, 89(12), pp.

464 5685–5689. Available at: <https://www.ncbi.nlm.nih.gov/pubmed/1608980>.

465 Domínguez J. Artiaga-López T., S. E. H. E. (2010) 'Métodos de Colonización y Cría Masiva', in Montoya Toledo,

466 H. (ed.) *Mosca de la Fruta: Fundamentos y Procedimientos para su Manejo*. México, D. F.: S y G Editores, pp.

467 259–276.

468 Donovan, S. E. *et al.* (2004) 'Comparison of Euryarchaea strains in the guts and food-soil of the soil-feeding

469 termite *Cubitermes fungifaber* across different soil types', *Appl Environ Microbiol*, 70(7), pp. 3884–3892. doi:

470 10.1128/AEM.70.7.3884-3892.2004.

471 Eichner, C. A. *et al.* (1999) 'Thermal gradient gel electrophoresis analysis of bioprotection from pollutant shocks

472 in the activated sludge microbial community', *Appl Environ Microbiol*, 65(1), pp. 102–109. Available at:

473 <https://www.ncbi.nlm.nih.gov/pubmed/9872766>.

474 Enkerlin, W. R. ( F. P. of N. T. in F. and A. J. R. F. (2018) *Trapping guidelines for area-wide fruit fly programmes*.

475 Available at: <http://www.fao.org/3/ca1574en/CA1574EN.pdf> (Accessed: 26 October 2020).

476 Ercolini, D. (2004) 'PCR-DGGE fingerprinting: novel strategies for detection of microbes in food', *J Microbiol*

477 *Methods*, 56(3), pp. 297–314. doi: 10.1016/j.mimet.2003.11.006.

478 FAO/OIEA (2018) *Manual para diferenciar moscas de Anastrepha ludens (Loew) silvestres y criadas de cepa*

479 *normal ("bi-sexual") y cepa sexada genéticamente (Tapachula-7), irradiadas y sin irradiar*.

480 Felsenstein, J. (1985) 'CONFIDENCE LIMITS ON PHYLOGENIES: AN APPROACH USING THE BOOTSTRAP',

481 *Evolution*, 39(4), pp. 783–791. doi: 10.1111/j.1558-5646.1985.tb00420.x.

482 Fuerst, J. A. (2013) 'The PVC superphylum: exceptions to the bacterial definition?', *Antonie Van Leeuwenhoek*,

483 104(4), pp. 451–466. doi: 10.1007/s10482-013-9986-1.

484 Gallo-Franco, J. J. and Toro-Perea, N. (2020) 'Variations in the Bacterial Communities in *Anastrepha obliqua*

485 (Diptera: Tephritidae) According to the Insect Life Stage and Host Plant', *Current Microbiology*, 77(7), pp.

486 1283–1291. doi: 10.1007/s00284-020-01939-y.

487 Gijzen, H. J. *et al.* (1991) 'Methanogenic bacteria as endosymbionts of the ciliate *Nyctotherus ovalis* in the

488 cockroach hindgut', *Appl Environ Microbiol*, 57(6), pp. 1630–1634. Available at:

489 <https://www.ncbi.nlm.nih.gov/pubmed/1908205>.

490 González, N. *et al.* (2011) 'Effect of surfactants on PAH biodegradation by a bacterial consortium and on the

491 dynamics of the bacterial community during the process', *Bioresour Technol*, 102(20), pp. 9438–9446. doi:

492 10.1016/j.biortech.2011.07.066.

493 Guillén-Navarro, K. *et al.* (2015) 'Assessment of methods to recover DNA from bacteria, fungi and archaea in

494 complex environmental samples', *Folia Microbiologica*, 60(6), pp. 551–558. doi: 10.1007/s12223-015-0403-1.

495 Hamden, H. *et al.* (2013) 'Fitness improvement of mass-reared sterile males of *Ceratitis capitata* (Vienna 8

496 strain) (Diptera: Tephritidae) after gut enrichment with probiotics', *J Econ Entomol*, 106(2), pp. 641–647.

497 Available at: <https://www.ncbi.nlm.nih.gov/pubmed/23786049>.

498 Hara, K. *et al.* (2005) 'Analysis of the archaeal sub-seafloor community at Suiyo Seamount on the Izu-Bonin Arc',

499 *Adv Space Res*, 35(9), pp. 1634–1642. Available at: <https://www.ncbi.nlm.nih.gov/pubmed/16175703>.

500 Heuer, H. *et al.* (1997) 'Analysis of actinomycete communities by specific amplification of genes encoding 16S

501 rRNA and gel-electrophoretic separation in denaturing gradients', *Applied and Environmental Microbiology*,

502 63(8), pp. 3233–3241. doi: 10.1128/aem.63.8.3233-3241.1997.

503 Im, W. T. *et al.* (2004) 'Herbaspirillum chlorophenolicum sp. nov., a 4-chlorophenol-degrading bacterium', *Int J*  
504 *Syst Evol Microbiol*, 54(Pt 3), pp. 851–855. doi: 10.1099/ijs.0.02812-0.

505 Imoulan, A. and Elmezziane, A. (2014) 'Pathogenicity of Beauveria bassiana isolated from Moroccan Argan  
506 forests soil against larvae of Ceratitis capitata (Diptera: Tephritidae) in laboratory conditions', *World J Microbiol*  
507 *Biotechnol*, 30(3), pp. 959–965. doi: 10.1007/s11274-013-1514-y.

508 İşeri, Ö. D. *et al.* (2011) 'Copper-induced oxidative damage, antioxidant response and genotoxicity in  
509 Lycopersicon esculentum Mill. and Cucumis sativus L', *Plant Cell Rep*, 30(9), pp. 1713–1721. doi:  
510 10.1007/s00299-011-1079-x.

511 Juneja, P. and Lazzaro, B. P. (2009) 'Providencia sneebia sp. nov. and Providencia burhodogranariae sp. nov.,  
512 isolated from wild Drosophila melanogaster', *Int J Syst Evol Microbiol*, 59(Pt 5), pp. 1108–1111. doi:  
513 10.1099/ijs.0.000117-0.

514 Jurkevitch, E. (2011) 'Riding the Trojan horse: combating pest insects with their own symbionts', *Microbial*  
515 *biotechnology*. 2011/02/21, 4(5), pp. 620–627. doi: 10.1111/j.1751-7915.2011.00249.x.

516 Kadavy, D. R. *et al.* (2000) 'Natural antibiotic resistance of bacteria isolated from larvae of the oil fly, Helaeomyia  
517 petrolei', *Appl Environ Microbiol*, 66(11), pp. 4615–4619. doi: 10.1128/AEM.66.11.4615-4619.2000.

518 Kadri, Z. *et al.* (2015) 'Enterococcus bulliens sp. nov., a novel lactic acid bacterium isolated from camel milk',  
519 *Antonie Van Leeuwenhoek*, 108(5), pp. 1257–1265. doi: 10.1007/s10482-015-0579-z.

520 Kapsetaki, S. E. *et al.* (2014) 'The bacterial metabolite 2-aminoacetophenone promotes association of  
521 pathogenic bacteria with flies', *Nature Communications*, 5. doi: 10.1038/ncomms5401.

522 Kearse, M. *et al.* (2012) 'Geneious Basic: an integrated and extendable desktop software platform for the  
523 organization and analysis of sequence data', *Bioinformatics*, 28(12), pp. 1647–1649. doi:  
524 10.1093/bioinformatics/bts199.

525 Kimura, M. (1980) 'A simple method for estimating evolutionary rates of base substitutions through comparative  
526 studies of nucleotide sequences', *J Mol Evol*, 16(2), pp. 111–120. Available at:  
527 <https://www.ncbi.nlm.nih.gov/pubmed/7463489>.

528 Klepzig, K. D. *et al.* (2009) 'Symbioses: a key driver of insect physiological processes, ecological interactions,  
529 evolutionary diversification, and impacts on humans', *Environ Entomol*, 38(1), pp. 67–77. Available at:  
530 <https://www.ncbi.nlm.nih.gov/pubmed/19791599>.

531 KNIPLING, E. F. (1959) 'Sterile-male method of population control', *Science*, 130(3380), pp. 902–904. Available  
532 at: <https://www.ncbi.nlm.nih.gov/pubmed/14410136>.

533 Koneru, S. L. *et al.* (2016) 'The bacterial community of entomophilic nematodes and host beetles', *Mol Ecol*,  
534 25(10), pp. 2312–2324. doi: 10.1111/mec.13614.

535 Könneke, M. *et al.* (2014) 'Ammonia-oxidizing archaea use the most energy-efficient aerobic pathway for CO<sub>2</sub>  
536 fixation', *Proc Natl Acad Sci U S A*, 111(22), pp. 8239–8244. doi: 10.1073/pnas.1402028111.

537 Kostovcik, M. *et al.* (2015) 'The ambrosia symbiosis is specific in some species and promiscuous in others:  
538 evidence from community pyrosequencing', *ISME J*, 9(1), pp. 126–138. doi: 10.1038/ismej.2014.115.

539 Kuzina, L. V *et al.* (2001) 'Isolation and identification of bacteria associated with adult laboratory Mexican fruit  
540 flies, *Anastrepha ludens* (Diptera: Tephritidae)', *Curr Microbiol*, 42(4), pp. 290–294. Available at:  
541 <https://www.ncbi.nlm.nih.gov/pubmed/11178731>.

542 Kyritsis, G. A. *et al.* (2017) 'Medfly gut microbiota and enhancement of the sterile insect technique: Similarities  
543 and differences of *Klebsiella oxytoca* and *Enterobacter* sp. AA26 probiotics during the larval and adult stages of  
544 the VIENNA 8D53+ genetic sexing strain', *Frontiers in Microbiology*, 8(OCT). doi: 10.3389/fmicb.2017.02064.

545 Larsson, A. (2014) 'AliView: a fast and lightweight alignment viewer and editor for large datasets', *Bioinformatics*,  
546 30(22), pp. 3276–3278. doi: 10.1093/bioinformatics/btu531.

547 Laursen, M. F., Dalgaard, M. D. and Bahl, M. I. (2017) 'Genomic GC-Content Affects the Accuracy of 16S rRNA  
548 Gene Sequencing Based Microbial Profiling due to PCR Bias', *Front Microbiol*, 8, p. 1934. doi:  
549 10.3389/fmicb.2017.01934.

550 Lemaitre, B. and Miguel-Aliaga, I. (2013) 'The digestive tract of *Drosophila melanogaster*', *Annu Rev Genet*, 47,  
551 pp. 377–404. doi: 10.1146/annurev-genet-111212-133343.

552 Liu, L. J. *et al.* (2016) 'Bacterial communities associated with invasive populations of *Bactrocera dorsalis*  
553 (Diptera: Tephritidae) in China', *Bull Entomol Res*, 106(6), pp. 718–728. doi: 10.1017/S0007485316000390.

554 Loubinoux, J. *et al.* (2002) 'Sulfate-reducing bacteria in human feces and their association with inflammatory  
555 bowel diseases', *FEMS Microbiol Ecol*, 40(2), pp. 107–112. doi: 10.1111/j.1574-6941.2002.tb00942.x.

556 Marchal-Ségault, D. (1993) '[The effect of commercial preparations of benlate, dithane M-45, copper sulfate and  
557 dichlofluanid on the fertility of *Drosophila melanogaster meigen*]', *J Environ Sci Health B*, 28(4), pp. 397–411. doi:  
558 10.1080/03601239309372832.

559 Matsuo, T., Ooe, S. and Ishikawa, Y. (1997) 'Limitation of dietary copper and zinc decreases superoxide  
560 dismutase activity in the onion fly, *Delia antiqua*', *Comp Biochem Physiol A Physiol*, 117(2), pp. 191–195.  
561 Available at: <https://www.ncbi.nlm.nih.gov/pubmed/9172377>.

562 May, L. A., Smiley, B. and Schmidt, M. G. (2001) 'Comparative denaturing gradient gel electrophoresis analysis  
563 of fungal communities associated with whole plant corn silage', *Can J Microbiol*, 47(9), pp. 829–841. Available at:  
564 <https://www.ncbi.nlm.nih.gov/pubmed/11683465>.

565 Montoya P. Toledo J., H. E. (2010) *Moscas de la fruta: fundamentos y procedimientos para su manejo*. México,  
566 D. F.: S y G Editores, 2010.

567 Muyzer, G., de Waal, E. C. and Uitterlinden, A. G. (1993) 'Profiling of complex microbial populations by  
568 denaturing gradient gel electrophoresis analysis of polymerase chain reaction-amplified genes coding for 16S  
569 rRNA', *Appl Environ Microbiol*, 59(3), pp. 695–700. Available at: <https://www.ncbi.nlm.nih.gov/pubmed/7683183>.

570 Navarro-Llopis, V. *et al.* (2015) 'Field Efficacy of a *Metarhizium anisopliae*-Based Attractant-Contaminant Device  
571 to Control *Ceratitis capitata* (Diptera: Tephritidae)', *J Econ Entomol*, 108(4), pp. 1570–1578. doi:  
572 10.1093/jee/tov157.

573 Nestel, D., Nemny-Lavy, E. and Chang, C. L. (2004) 'Lipid and protein loads in pupating larvae and emerging  
574 adults as affected by the composition of Mediterranean fruit fly (*Ceratitis capitata*) meridic larval diets', *Arch*  
575 *Insect Biochem Physiol*, 56(3), pp. 97–109. doi: 10.1002/arch.20000.

576 Nikolcheva, L. G., Cockshutt, A. M. and Bärlocher, F. (2003) 'Determining diversity of freshwater fungi on  
577 decaying leaves: comparison of traditional and molecular approaches', *Appl Environ Microbiol*, 69(5), pp.  
578 2548–2554. Available at: <https://www.ncbi.nlm.nih.gov/pubmed/12732520>.

579 Nübel, U. *et al.* (1996) 'Sequence heterogeneities of genes encoding 16S rRNAs in *Paenibacillus polymyxa*  
580 detected by temperature gradient gel electrophoresis', *J Bacteriol*, 178(19), pp. 5636–5643. Available at:  
581 <https://www.ncbi.nlm.nih.gov/pubmed/8824607>.

582 Obadia, B. *et al.* (2018) 'Diet influences host-microbiota associations in', *Proc Natl Acad Sci U S A*, 115(20), pp.  
583 E4547–E4548. doi: 10.1073/pnas.1804948115.

584 Ordax, M. *et al.* (2015) 'Medfly *ceratitis capitata* as potential vector for fire blight pathogen *erwinia amylovora*:  
585 Survival and transmission', *PLoS ONE*, 10(5). doi: 10.1371/journal.pone.0127560.

586 Orozco-Dávila, D. *et al.* (2017) 'Mass rearing and sterile insect releases for the control of *Anastrepha* spp. pests



587 in Mexico - a review', *Entomologia Experimentalis et Applicata*, 164(3), pp. 176–187. doi: 10.1111/eea.12581.

588 Ortiz-Urquiza, A. *et al.* (2009) 'Purification and characterisation of proteins secreted by the entomopathogenic

589 fungus *Metarhizium anisopliae* with insecticidal activity against adults of the Mediterranean fruit fly, *Ceratitis*

590 *capitata* (Diptera: Tephritidae)', *Pest Manag Sci*, 65(10), pp. 1130–1139. doi: 10.1002/ps.1803.

591 Pikuta, E. V, Hoover, R. B. and Tang, J. (2007) 'Microbial extremophiles at the limits of life', *Crit Rev Microbiol*,

592 33(3), pp. 183–209. doi: 10.1080/10408410701451948.

593 Piñero, J. C. *et al.* (2015) 'Ammonium Acetate Enhances the Attractiveness of a Variety of Protein-Based Baits to

594 Female *Ceratitis capitata* (Diptera: Tephritidae)', *J Econ Entomol*, 108(2), pp. 694–700. doi: 10.1093/jee/tov046.

595 Piper, A. M. *et al.* (2017) 'Two Gut-Associated Yeasts in a Tephritid Fruit Fly have Contrasting Effects on Adult

596 Attraction and Larval Survival', *J Chem Ecol*, 43(9), pp. 891–901. doi: 10.1007/s10886-017-0877-1.

597 Poehlein, A. *et al.* (2016) 'First Insights into the Genome Sequence of the Halophilic Archaeon *Halalkalicoccus*

598 *paucihalophilus* (DSM 24557)', *Genome Announc*, 4(3). doi: 10.1128/genomeA.00382-16.

599 Qin, Y. *et al.* (2015) 'Global Establishment Risk of Economically Important Fruit Fly Species (Tephritidae)', *PLOS*

600 *ONE*. Edited by C. Wegener, 10(1), p. e0116424. doi: 10.1371/journal.pone.0116424.

601 Qiu, Y. L. *et al.* (2013) 'Oligosphaera ethanolica gen. nov., sp. nov., an anaerobic, carbohydrate-fermenting

602 bacterium isolated from methanogenic sludge, and description of *Oligosphaeria classis nov.* in the phylum

603 *Lentisphaerae*', *Int J Syst Evol Microbiol*, 63(Pt 2), pp. 533–539. doi: 10.1099/ijs.0.039545-0.

604 Rempoulakis, P. *et al.* (2018) 'Microbial composition affects the performance of an artificial Tephritid larval diet',

605 *Bulletin of Entomological Research*, 108(4), pp. 434–441. doi: 10.1017/S0007485317000943.

606 Rivera-Ciprian, J. P. *et al.* (2017) 'Midgut Protease Activity During Larval Development of *Anastrepha obliqua*

607 (Diptera: Tephritidae) Fed With Natural and Artificial Diet', *Journal of Insect Science*, 17(6). doi:

608 10.1093/jisesa/iex090.

609 Roque-Romero, L. *et al.* (2020) 'Attractiveness and Sexual Competitiveness of *Anastrepha obliqua* Males

610 (Diptera: Tephritidae) Fed on a Diet Enriched With *Providencia rettgeri*', *Frontiers in Microbiology*, 11, p. 1777.

611 doi: 10.3389/fmicb.2020.01777.

612 Rui, L. *et al.* (2015) 'Pathogenicity and characterization of a novel *Bacillus cereus sensu lato* isolate toxic to the

613 Mediterranean fruit fly *Ceratitis capitata* Wied', *J Invertebr Pathol*, 126, pp. 71–77. doi: 10.1016/j.jip.2015.01.010.

614 Sambrook, J. (2001) *Molecular cloning: a laboratory manual*. Third edition. Cold Spring Harbor, N.Y.: Cold



615 Spring Harbor Laboratory Press, [2001] ©2001. Available at:  
616 [https://www.researchgate.net/publication/200037138\\_Molecular\\_Cloning\\_A\\_Laboratory\\_Manual\\_3-Volume\\_Set](https://www.researchgate.net/publication/200037138_Molecular_Cloning_A_Laboratory_Manual_3-Volume_Set)  
617 (Accessed: 26 October 2020).  
618 Samri, S. E. *et al.* (2017) 'Insecticidal activity of a Moroccan strain of *Streptomyces phaeochromogenes* LD-37  
619 on larvae, pupae and adults of the Mediterranean fruit fly, *Ceratitis capitata* (Diptera: Tephritidae)', *Bull Entomol*  
620 *Res*, 107(2), pp. 217–224. doi: 10.1017/S000748531600078X.  
621 Sela, S. *et al.* (2005) 'Mediterranean fruit fly as a potential vector of bacterial pathogens', *Applied and*  
622 *Environmental Microbiology*, 71(7), pp. 4052–4056. doi: 10.1128/AEM.71.7.4052-4056.2005.  
623 SENASICA (2018) *Informe semestral campaña nacional contra moscas de la fruta*. Mexico. Available at:  
624 [https://www.gob.mx/cms/uploads/attachment/file/397944/Primer\\_Informe\\_Semestral\\_CNMF.pdf](https://www.gob.mx/cms/uploads/attachment/file/397944/Primer_Informe_Semestral_CNMF.pdf) (Accessed: 21  
625 October 2020).  
626 Shelly, T. E. and McInnis, D. O. (2001) 'Exposure to ginger root oil enhances mating success of irradiated,  
627 mass-reared males of Mediterranean fruit fly (Diptera: Tephritidae)', *J Econ Entomol*, 94(6), pp. 1413–1418.  
628 Available at: <https://www.ncbi.nlm.nih.gov/pubmed/11777043>.  
629 Shimoi, H. and Tadenuma, M. (1991) 'Characterization of *Rarobacter faecitabidus* protease I, a yeast-lytic serine  
630 protease having mannose-binding activity', *J Biochem*, 110(4), pp. 608–613. Available at:  
631 <https://www.ncbi.nlm.nih.gov/pubmed/1778983>.  
632 Sommer, F. *et al.* (2016) 'The Gut Microbiota Modulates Energy Metabolism in the Hibernating Brown Bear *Ursus*  
633 *arctos*', *Cell Reports*, 14(7), pp. 1655–1661. doi: 10.1016/j.celrep.2016.01.026.  
634 Southon, A., Burke, R. and Camakaris, J. (2013) 'What can flies tell us about copper homeostasis?',  
635 *Metallomics*, 5(10), pp. 1346–1356. doi: 10.1039/c3mt00105a.  
636 Stefanini, I. (2018) 'Yeast-insect associations: It takes guts', *Yeast*, 35(4), pp. 315–330. doi: 10.1002/yea.3309.  
637 Szyniszewska, A. M. and Tatem, A. J. (2014) 'Global Assessment of Seasonal Potential Distribution of  
638 Mediterranean Fruit Fly, *Ceratitis capitata* (Diptera: Tephritidae)', *PLoS ONE*. Edited by K. Bourtzis, 9(11), p.  
639 e111582. doi: 10.1371/journal.pone.0111582.  
640 Tamura, K. (1992) 'Estimation of the number of nucleotide substitutions when there are strong  
641 transition-transversion and G+C-content biases', *Mol Biol Evol*, 9(4), pp. 678–687. doi:  
642 10.1093/oxfordjournals.molbev.a040752.

643 Tamura, K. *et al.* (2013) 'MEGA6: Molecular Evolutionary Genetics Analysis version 6.0', *Mol Biol Evol*, 30(12),  
644 pp. 2725–2729. doi: 10.1093/molbev/mst197.

645 Thaïss, C. A. *et al.* (2016) 'The microbiome and innate immunity', *Nature*. Nature Publishing Group, pp. 65–74.  
646 doi: 10.1038/nature18847.

647 Thompson, J. D., Higgins, D. G. and Gibson, T. J. (1994) 'CLUSTAL W: Improving the sensitivity of progressive  
648 multiple sequence alignment through sequence weighting, position-specific gap penalties and weight matrix  
649 choice', *Nucleic Acids Research*, 22(22), pp. 4673–4680. doi: 10.1093/nar/22.22.4673.

650 Toshchakov, S. V *et al.* (2015) 'Complete genome sequence of and proposal of *Thermofilum uzonense* sp. nov. a  
651 novel hyperthermophilic crenarchaeon and emended description of the genus *Thermofilum*', *Stand Genomic Sci*,  
652 10, p. 122. doi: 10.1186/s40793-015-0105-y.

653 Tournai, M. *et al.* (2011) 'Nitrososphaera viennensis, an ammonia oxidizing archaeon from soil', *Proc Natl Acad*  
654 *Sci U S A*, 108(20), pp. 8420–8425. doi: 10.1073/pnas.1013488108.

655 Varotto Boccazzi, I. *et al.* (2017) 'A survey of the mycobiota associated with larvae of the black soldier fly  
656 (*Hermetia illucens*) reared for feed production', *PLoS One*, 12(8), p. e0182533. doi:  
657 10.1371/journal.pone.0182533.

658 Vega, F. and Dowd, P. (2005) 'The role of yeast as insect endosymbionts', in *Insect-Fungal Associations:*  
659 *Ecology and Evolution*, pp. 211–243.

660 Ventura, C. *et al.* (2018) 'Comparative Analysis of the Gut Bacterial Community of Four *Anastrepha* Fruit Flies  
661 (Diptera: Tephritidae) Based on Pyrosequencing', *Curr Microbiol*, 75(8), pp. 966–976. doi:  
662 10.1007/s00284-018-1473-5.

663 Wang, A. *et al.* (2014) 'Bacterial communities in the gut and reproductive organs of *Bactrocera minax* (Diptera:  
664 Tephritidae) based on 454 pyrosequencing', *PLoS One*, 9(9), p. e106988. doi: 10.1371/journal.pone.0106988.

665 Wegmann, U. *et al.* (2017) 'Complete Genome Sequence of', *Genome Announc*, 5(7). doi:  
666 10.1128/genomeA.01528-16.

667 White T. A. *et al.* (1990) *Amplification and direct sequencing of fungal ribosomal RNA genes for phylogenetics*.  
668 Available at: <https://www.scienceopen.com/document?vid=f4505cd7-6ec2-43f4-b1d4-ddee592ba145> (Accessed:  
669 26 October 2020).

670 Xue, Y. *et al.* (2005) '*Halalkalicoccus tibetensis* gen. nov., sp. nov., representing a novel genus of haloalkaliphilic

671 archaea', *Int J Syst Evol Microbiol*, 55(Pt 6), pp. 2501–2505. doi: 10.1099/ijms.0.63916-0.

672 Yadav, A. N. *et al.* (2015) 'Haloarchaea Endowed with Phosphorus Solubilization Attribute Implicated in

673 Phosphorus Cycle', *Sci Rep*, 5, p. 12293. doi: 10.1038/srep12293.

674 Yang, F. *et al.* (2010) 'Biosequestration via cooperative binding of copper by *Ralstonia pickettii*', *Environ Technol*,

675 31(8–9), pp. 1045–1060. doi: 10.1080/09593330.2010.487290.

676 Zoetendal, E. G. *et al.* (2003) 'Victivallis vadensis gen. nov., sp. nov., a sugar-fermenting anaerobe from human

677 faeces', *Int J Syst Evol Microbiol*, 53(Pt 1), pp. 211–215. doi: 10.1099/ijms.0.02362-0.

678

## 679 Table

Table 1. Diversity (H') and Similitud (J) indexes of the microbial communities found in the midgut of *A. obliqua*

| Sample | Bacteria |                 |      | Archaea |     |      | Fungi |     |
|--------|----------|-----------------|------|---------|-----|------|-------|-----|
|        | H        | J %             | J %* | H       | J % | J %* | H     | J % |
| AW     | 1.22     | 53 <sup>1</sup> | 36   | 1.0     | 77  | 78   | 0.8   | 62  |
| LW     | 1.07     |                 | 52   | 0.77    |     | 85   | 0.67  |     |
| AL     | 0.95     | 63 <sup>2</sup> | 36   | 0.8     | 83  | 78   | 0     | 0   |
| LL     | 0.94     |                 | 52   | 0.77    |     | 85   | 0     |     |

Shannon (H') and Jaccard (J) indexes were determined from DGGE as described in the methodology. Adult wild (AW), Larvae wild (LW), Adult laboratory (AL) and Larvae laboratory (LL). Comparison between AW and LW (%<sup>1</sup>); Comparison between AL and LL (%<sup>2</sup>); Comparisons between adults and between larvae samples independently of their environmental origin (%\*) (i.e. AW-AL; LW-LL).

680

## 681 Figures legends

682 **Fig. 1** Phylogenetic tree of bacteria species identified in the intestine of *Anastrepha obliqua*. Gram negative and

683 positive bacterial communities are delimited in blue and red, respectively. The 16S ribosomal DNA (rDNA)

684 bacterial clones obtained from wild adult and larvae flies are shown as WL\_ (pink triangles) and WA\_ (red

685 triangles); the laboratory samples as LL\_ (blue light circles) and LA\_ (blue circles). The tree (439 positions) was

686 constructed using maximum composite likelihood (MCL) with a Kimura 2-parameter model. The percentage

687 higher than 70% of 1000 bootstrap resampling is shown next to the branches. Evolutionary analyses were

688 conducted using MEGAX.

689 **Fig. 2** Phylogenetic tree of archaea communities identified in the intestine of *A. obliqua*. Two main clades can be  
 690 seen, archaea (green) and bacterial (blue) communities. The 16S rDNA bacterial clones obtained from wild adult  
 691 and larvae flies are shown as WL\_ (pink triangles) and WA\_ (red triangles); the laboratory samples as LL\_ (blue  
 692 light circles) and LA\_ (blue circles). DAMBE software was employed to merge equal sequence clones. The  
 693 neighbor-joining method to a matrix of pairwise distances estimation using the MCL approach with a Kimura  
 694 2-parameter model was used to construct the tree (406 positions). The percentage higher than 70% of 1000  
 695 bootstrap resampling of trees in which the associated taxa clustered together is shown next to the branches.  
 696 Evolutionary analyses were conducted using MEGAX.

697 **Fig. 3** Microbial community profile identified in the intestine of *A. obliqua*. The 16S rDNA bacterial, actinomycete,  
 698 and archaea clones obtained from wild and laboratory adult and larvae flies were curated, merged and analyzed  
 699 in Geneious software to determine 16S biodiversity. Most of the recovered sequences (~85%) were relative to  
 700 bacteria showing three main clades (proteobacteria, firmicutes and actinomycetes) ~25% were relative to  
 701 Archaea.

Figure 1

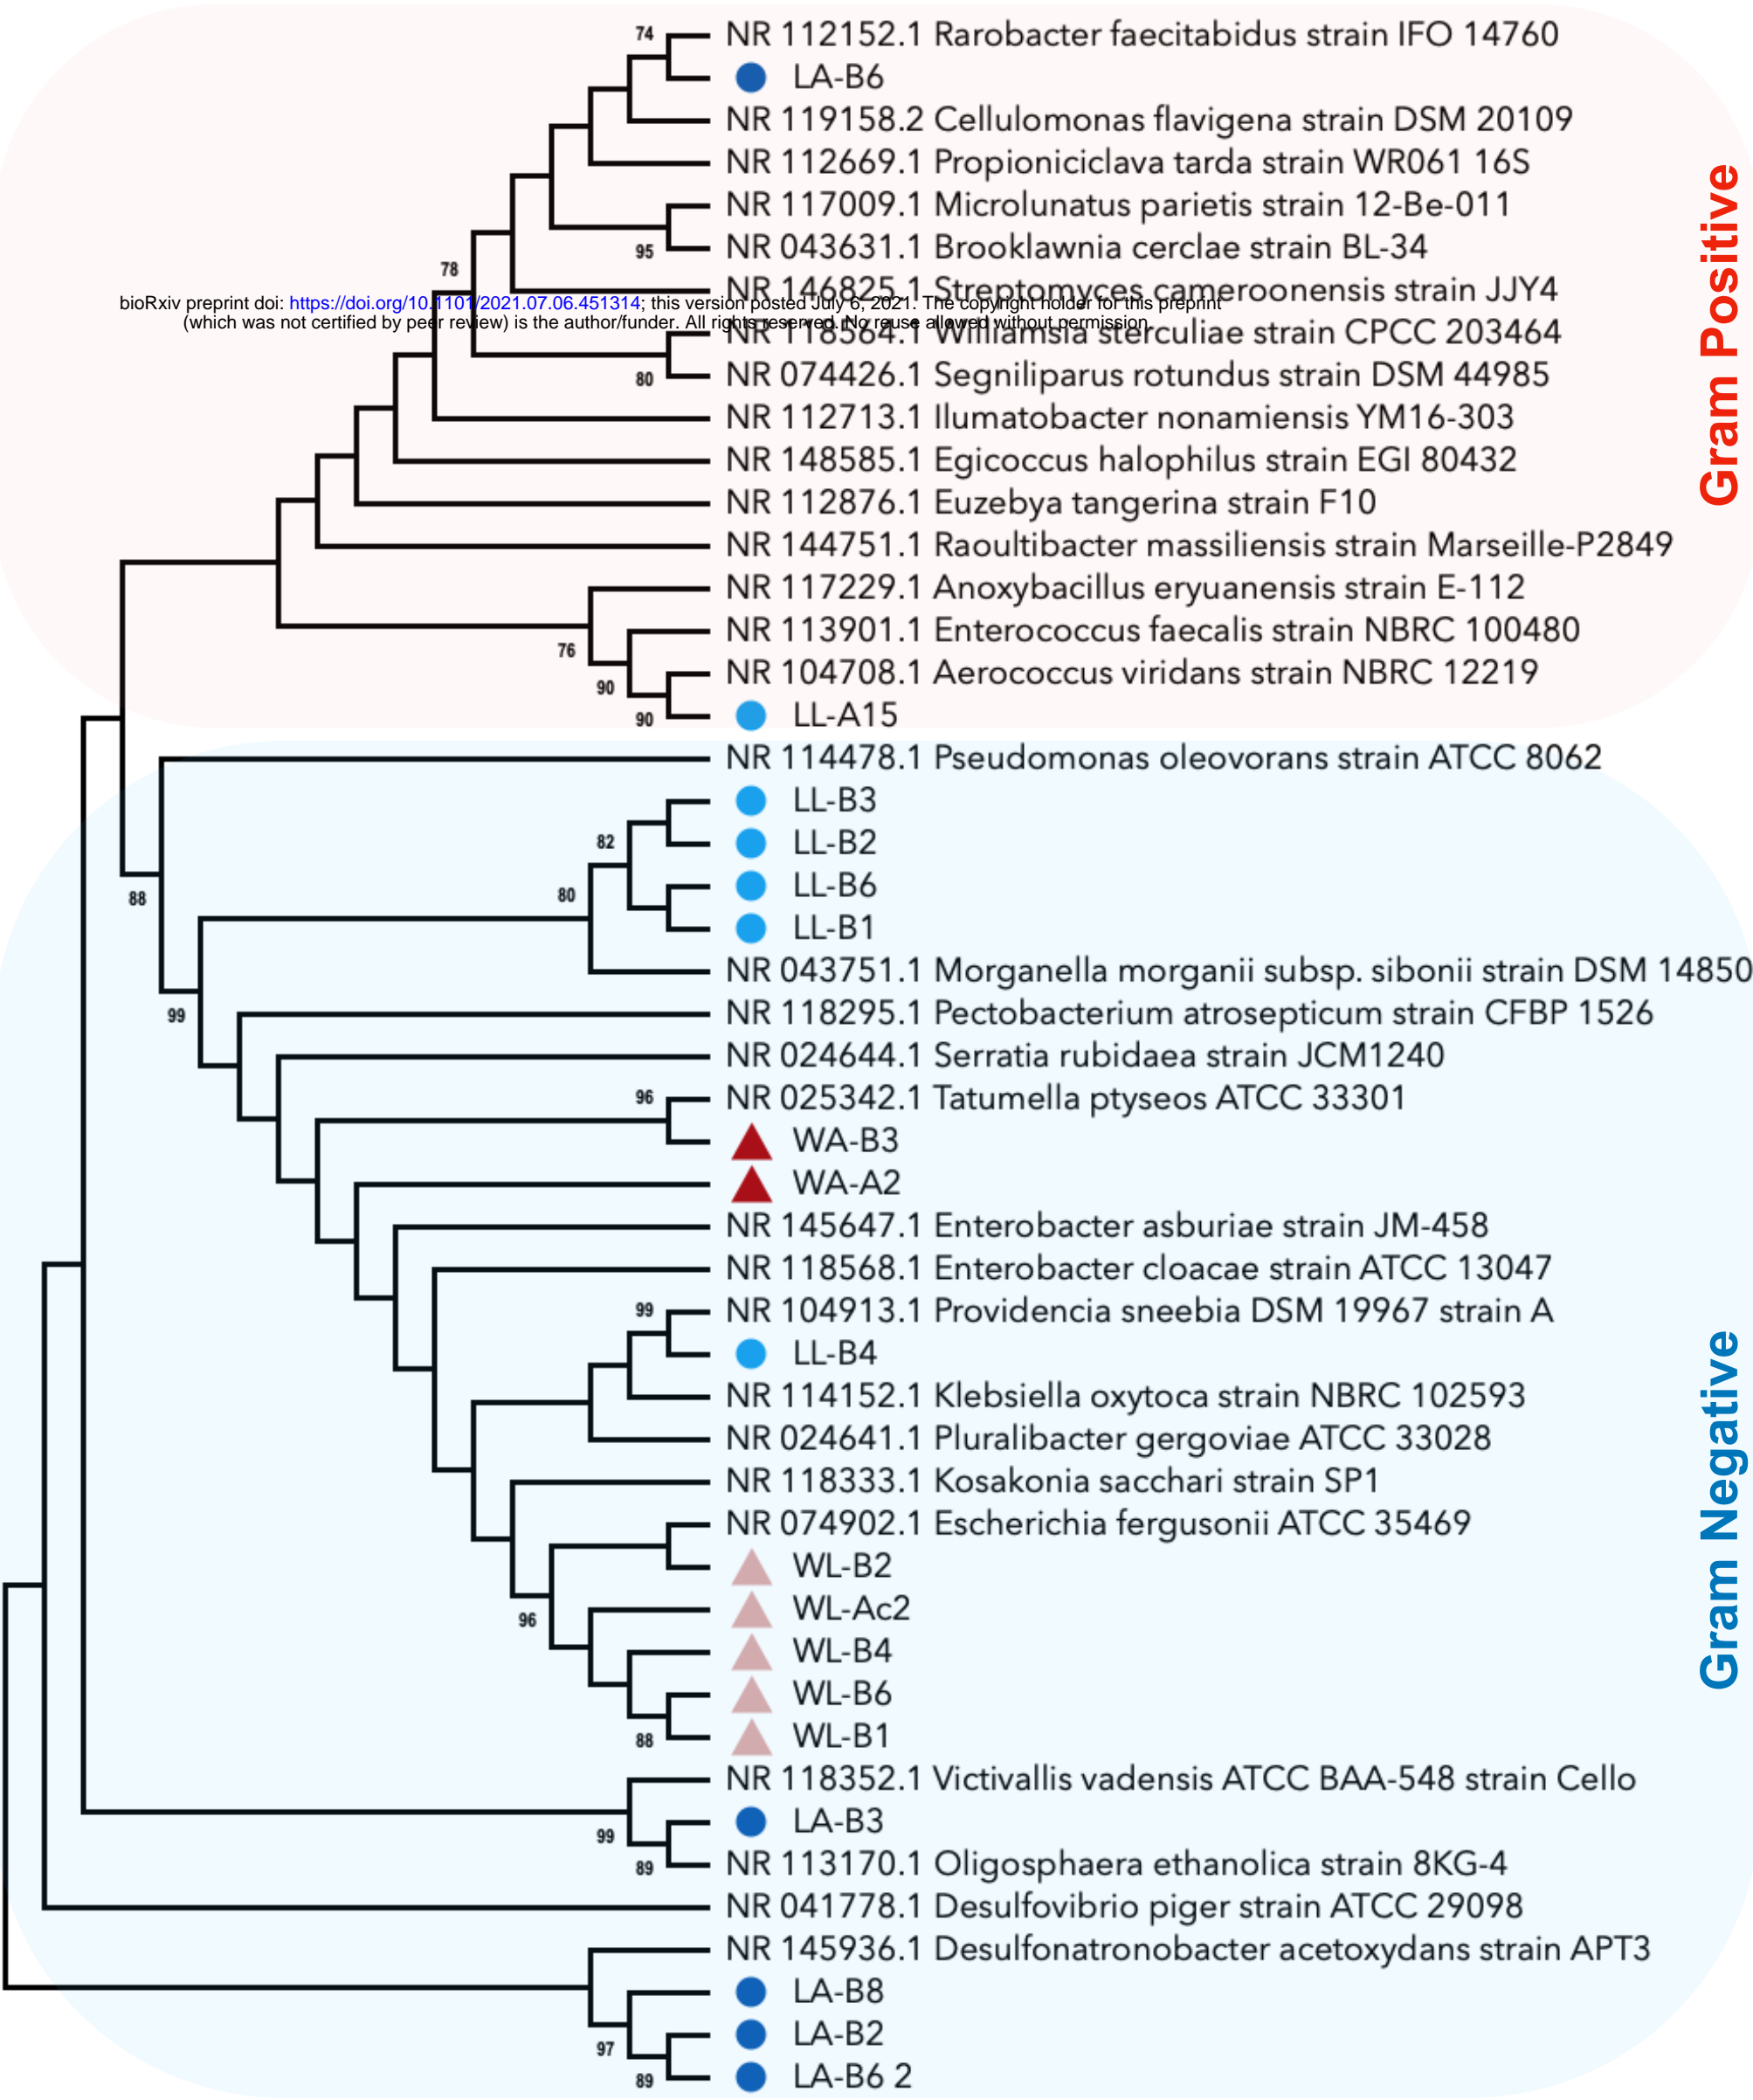



Figure 2

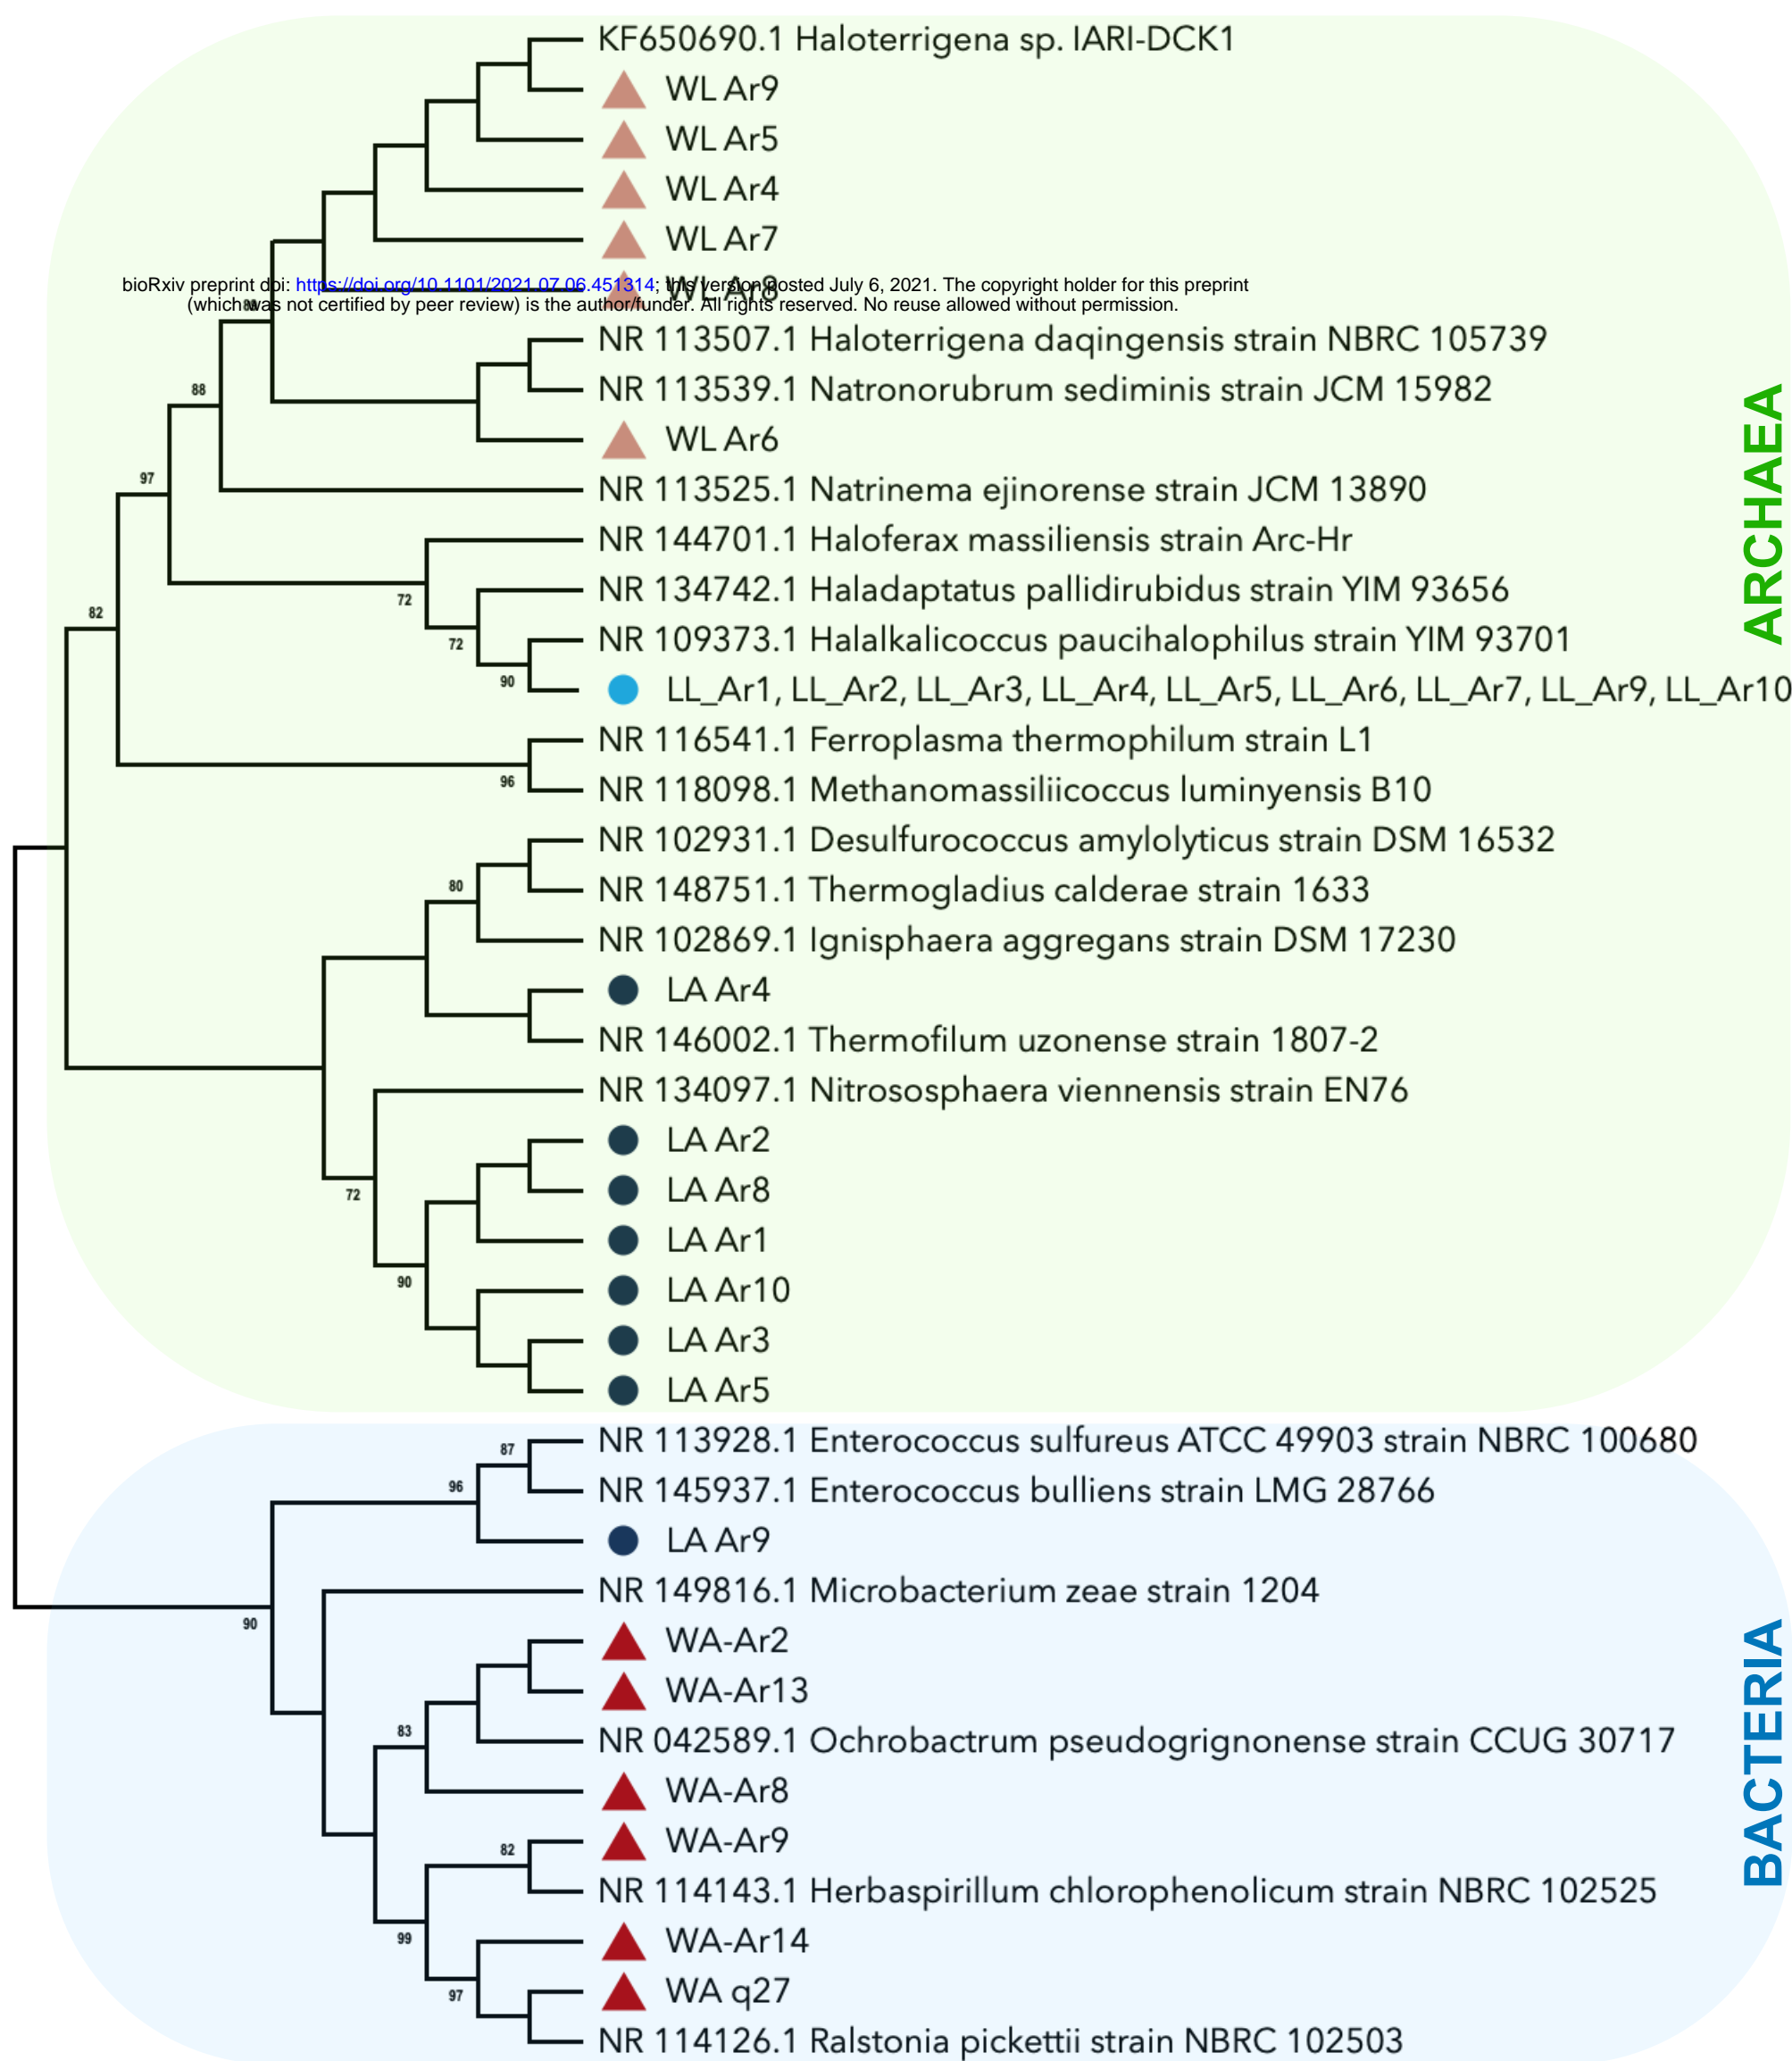

### Figure 3

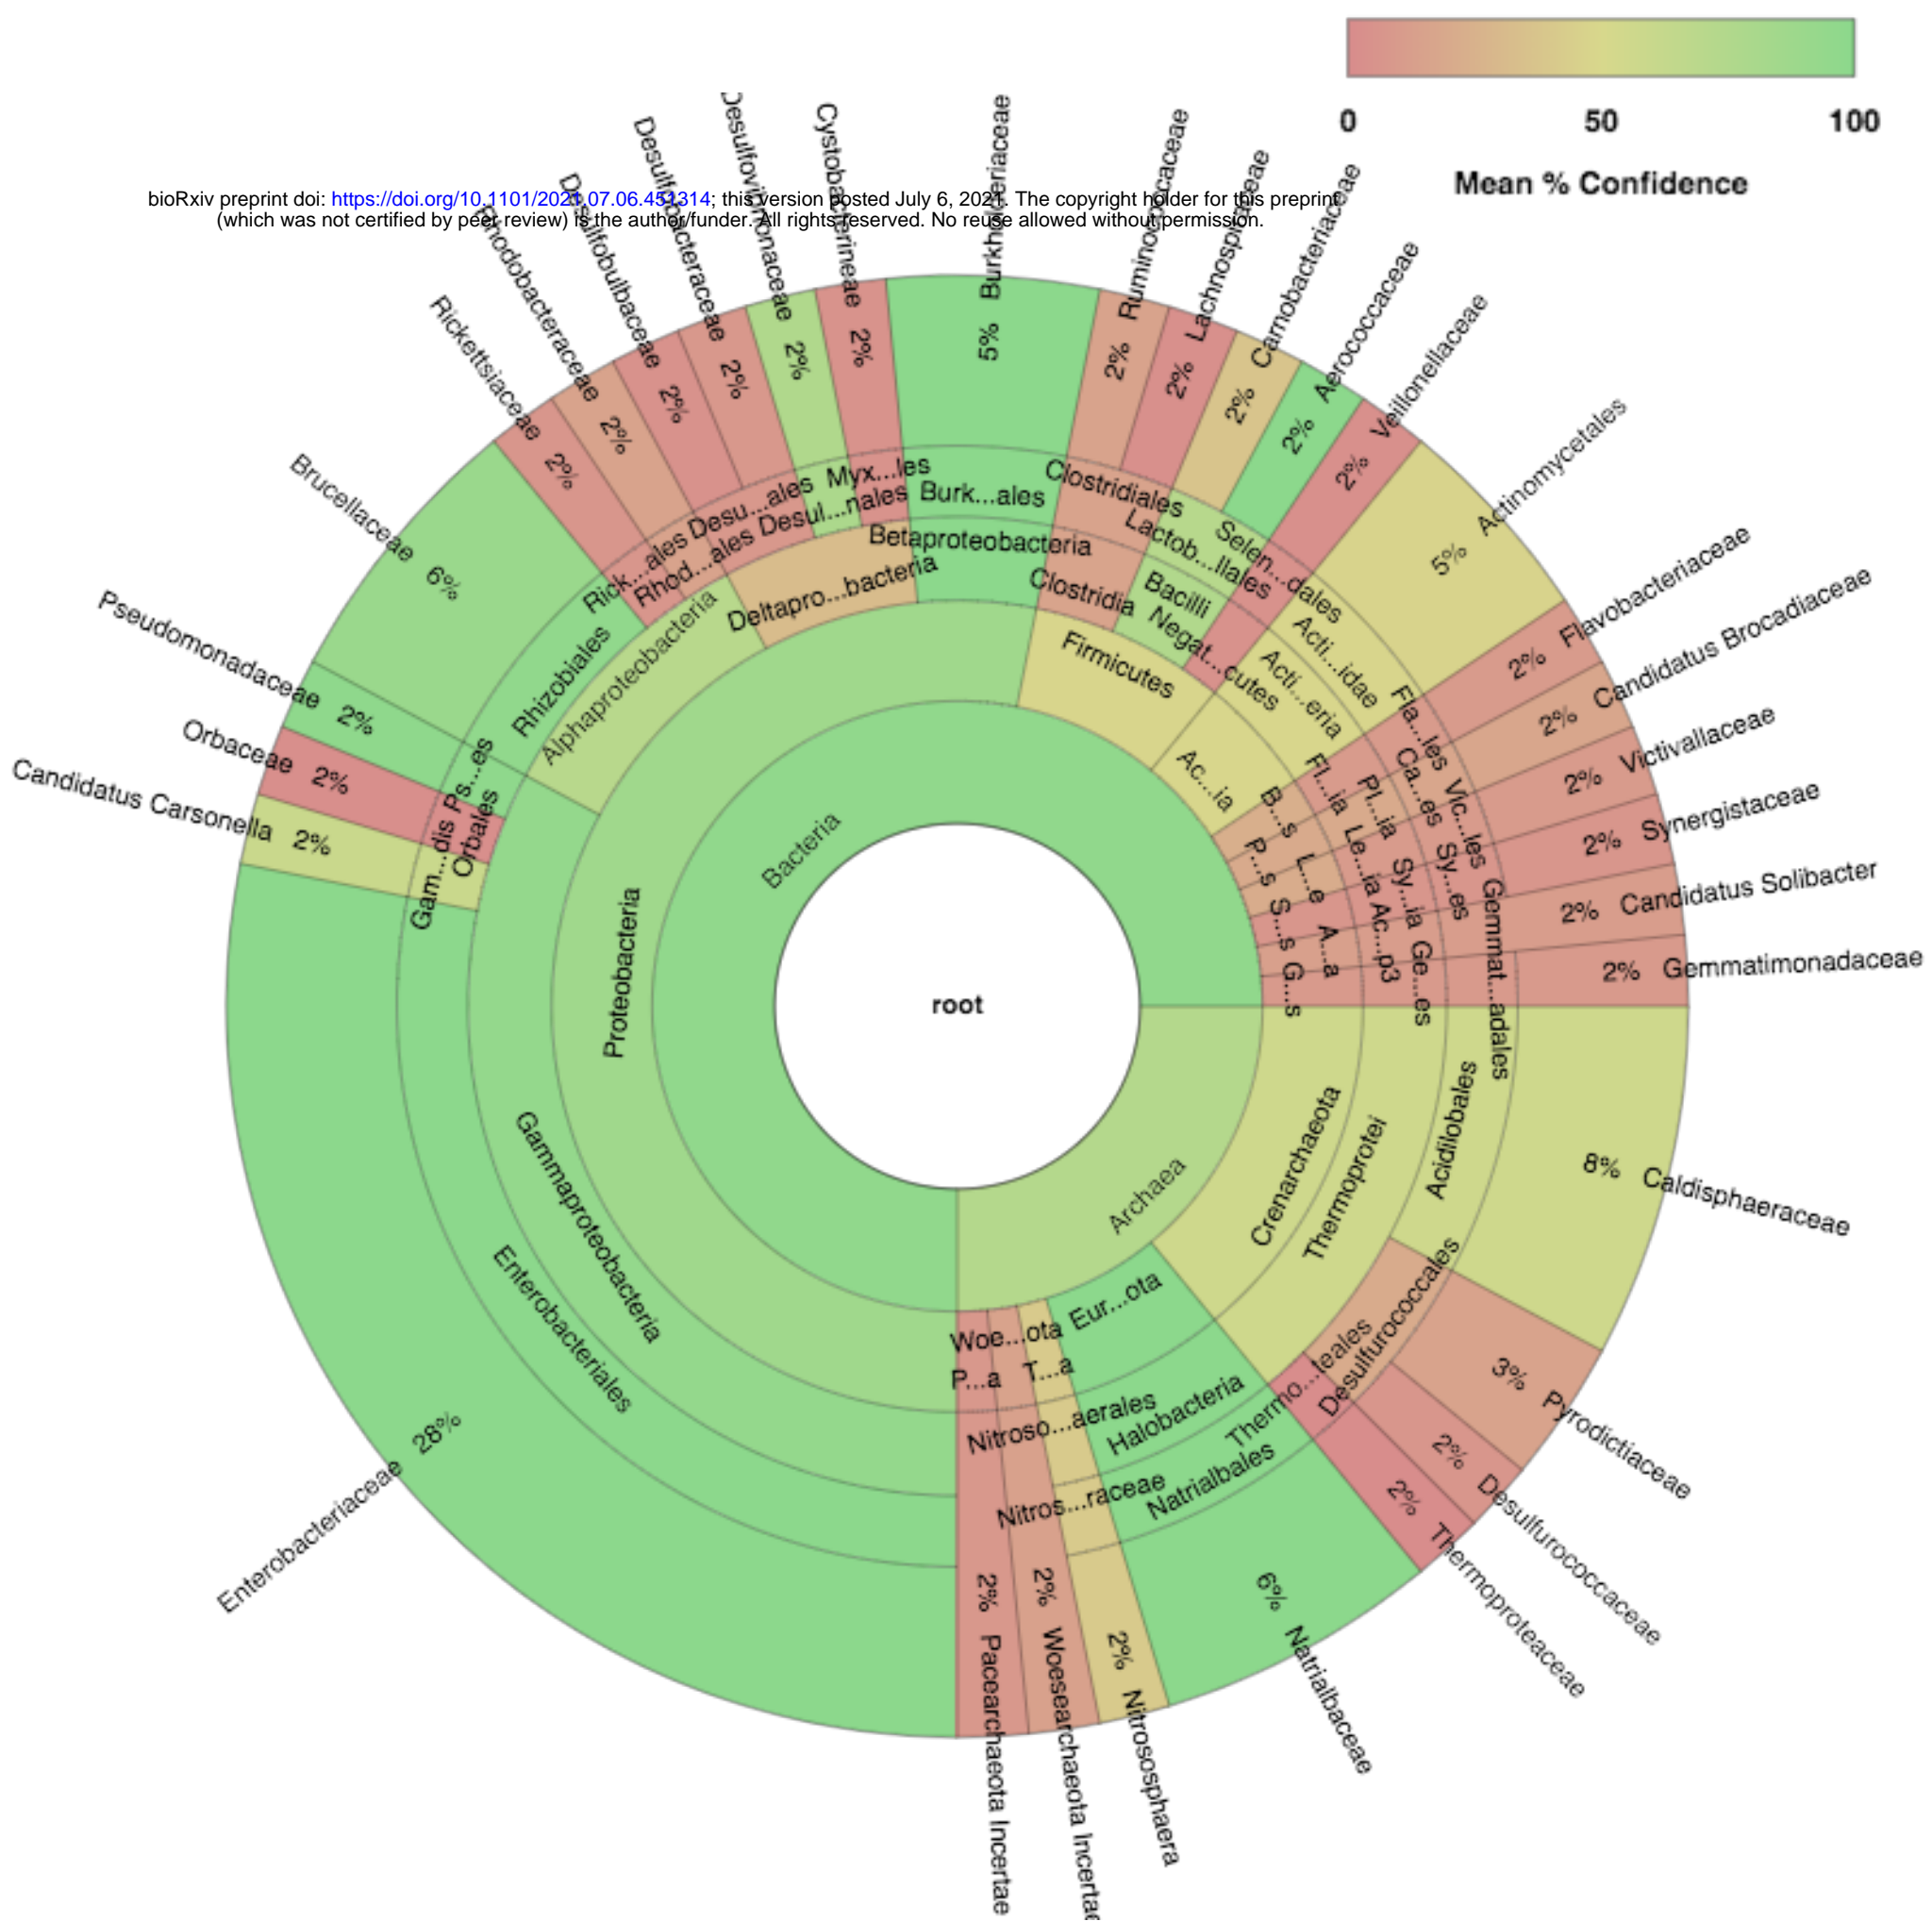

Source: http://biorxiv.org/content/10.1101/2021.07.06.451314v1.full.pdf
